1 **Dietary Proanthocyanidins Exert Localized Immunomodulatory Effects in**  
2 **Porcine Pulmonary and Gastrointestinal Tissues during *Ascaris suum*-induced**  
3 **Type 2 inflammation**

4 Audrey Inge Schytz Andersen-Civil<sup>1</sup>, Laura J. Myhill<sup>1</sup>, Nilay Büdeyri Gökgöz<sup>2</sup>, Marica T.  
5 Engström<sup>3</sup>, Helena Mejer<sup>1</sup>, Wayne E. Zeller<sup>4</sup>, Juha-Pekka Salminen<sup>3</sup>, Lukasz Krych<sup>2</sup>, Charlotte  
6 Lauridsen<sup>5</sup>, Dennis S. Nielsen<sup>2</sup>, Stig M. Thamsborg<sup>1</sup>, Andrew R. Williams<sup>1\*</sup>

7 <sup>1</sup> Department of Veterinary and Animal Sciences, University of Copenhagen, Frederiksberg,  
8 Denmark

9 <sup>2</sup> Department of Food Science, University of Copenhagen, Frederiksberg, Denmark

10 <sup>3</sup> Natural Chemistry Research Group, Department of Chemistry, University of Turku, Finland

11 <sup>4</sup> USDA-ARS, U.S. Dairy Forage Research Center, Madison, WI, USA

12 <sup>5</sup> Department of Animal Science, Aarhus University, Tjele, Denmark

13

14 \* Corresponding author:

15 Department of Veterinary and Animal Sciences

16 University of Copenhagen

17 Dyr lægevej 100

18 DK-1870 Frederiksberg C, Denmark

19 [arw@sund.ku.dk](mailto:arw@sund.ku.dk)

20 +45 353 32797

21 **Running title:** Proanthocyanidins and *Ascaris* in pigs

22

23

24

---

25

26

## 27 **Abstract**

28 Bioactive dietary components may considerably influence intestinal health and resistance to enteric  
29 disease. Proanthocyanidins (PAC) are dietary polyphenols with putative health-promoting activity  
30 that have been increasingly studied for their anti-inflammatory and immunomodulatory effects.  
31 However, whether dietary PAC can regulate type-2 immune function and inflammation at mucosal  
32 surfaces remains unclear. Here, we investigated whether diets supplemented with purified PAC  
33 modulated pulmonary and intestinal mucosal immune responses during infection with the helminth  
34 parasite *Ascaris suum* in pigs. *A. suum* infection induced a type 2-biased immune response in lung  
35 and intestinal tissues, characterized by pulmonary granulocytosis, increased Th2/Th1 T cell ratios in  
36 tracheal-bronchial lymph nodes, intestinal eosinophilia, and modulation of genes involved in  
37 mucosal barrier function and immunity. We observed that PAC had only minor effects on  
38 pulmonary immune responses, regardless of concurrent *A. suum* infection. However, RNA-  
39 sequencing of intestinal tissues revealed that dietary PAC significantly enhanced transcriptional  
40 responses related to immune function, antioxidant responses, and cellular stress activity, both in  
41 uninfected and *A. suum*-infected animals. *A. suum* infection and dietary PAC both induced distinct  
42 changes in gut microbiota composition, primarily in the jejunum and colon, respectively. Notably,  
43 PAC substantially increased *Limosilactobacillus reuteri* abundance in the colon of both naïve and  
44 *A. suum*-infected animals. Thus, dietary PAC may have distinct beneficial effects on intestinal  
45 health during infection with mucosal pathogens, whilst having limited activity to modulate  
46 naturally-induced type-2 pulmonary inflammation. Our results shed further light on the mechanisms  
47 underlying the health-promoting properties of PAC-rich foods, and may aid in the design of novel  
48 dietary supplements to regulate mucosal inflammatory responses in the gastrointestinal tract.

49

50

51

52

## 53 **Introduction**

54 Effective immune function is essential for maintenance of health and tissue homeostasis. The role  
55 of diet in regulating immunity and inflammation at mucosal barrier surfaces has been well-  
56 established, and immunomodulatory dietary components have therefore gained tremendous  
57 attention in scientific research in recent years. Polyphenols, terpenoids, and carotenoids are  
58 examples of three central groups of phytonutrients, which have been extensively studied for their  
59 beneficial impact on health and disease<sup>1-4</sup>. Proanthocyanidins (PAC) are a type of polyphenol,  
60 commonly found in a plant-based diet, which have characteristic chemical structures with known  
61 anti-oxidant and anti-inflammatory properties<sup>5</sup>.

62

63 Numerous studies have demonstrated that PAC play an important role in the regulation of immune  
64 function and may offer therapeutic potential towards inflammatory intestinal diseases. PAC exert  
65 strong antioxidant and anti-inflammatory effects in cellular models<sup>6, 7</sup>, and are able to modulate  
66 various physiological parameters when consumed as part of the diet, such as increasing mucus  
67 production in human patients with ulcerative colitis, and alleviating inflammation in TNBS-induced  
68 colitis by inhibiting NF- $\kappa$ B signaling pathways<sup>8, 9</sup>. Another consistent outcome of dietary PAC  
69 supplementation is changes in gut microbiota (GM) composition, which has been observed in both  
70 murine and porcine models, with some evidence also from human studies<sup>10-14</sup>. PAC have been  
71 shown to increase the abundance of Lactobacilli and *Bifidobacterium* species, which are commonly  
72 associated with a healthy gut environment, as well as increasing levels of faecal short chain fatty  
73 acids (SCFA) such as propionic acid<sup>11, 15, 16</sup>. Thus, the immunomodulatory effects of PAC may be  
74 caused by direct interactions with immune cells and/or indirect modulation of immune responses as  
75 a result of PAC-induced alteration of the GM<sup>17</sup>. These bioactive effects on intestinal immune cells  
76 or the GM may have significant implications for inflammation in the gut, as well as at distant sites,  
77 such as the lungs, with increasing evidence suggesting a gut-lung axis and clear connection between  
78 gut function, the microbiome, and lung homeostasis<sup>18</sup>.

79

80 Parasitic worm (helminth) infections are widespread in humans and animals worldwide and cause  
81 substantial morbidity<sup>19, 20</sup>. The characteristics of immune responses during helminth infection  
82 include a strongly Th2 polarized immune response, characterized by eosinophilia, mastocytosis and  
83 increased production of IL-4, IL-13 and other type-2 cytokines<sup>21</sup>. Thus, helminth infection models

84 offer a valuable opportunity to assess how different dietary interventions can promote resistance to  
85 parasitic infection, as well as modulating type-2 responses which play a significant role in  
86 pathologies such as allergies. In mice, PAC may regulate allergen-induced type-2 inflammation in  
87 the lungs by decreasing the expression of IL-4, IL-5 and IL-13<sup>22</sup>. However, the ability of PAC to  
88 modulate pathogen-induced type-2 mucosal immune responses, such as those induced by tissue-  
89 invasive helminths, has not been examined in detail. Such studies may shed light on the interactions  
90 between PAC-rich diets and immunity to helminth infection, and other type-2 driven pathologies,  
91 such as asthma and ulcerative colitis.

92

93 Pigs are a highly translatable large-animal model for humans, due to the anatomical and  
94 immunological similarities between humans and swine. The porcine roundworm *Ascaris suum* is  
95 widely prevalent in pig farms globally and closely related to *A. lumbricoides*, which is the most  
96 common helminth in humans<sup>23</sup>. After infection, *A. suum* larvae have a complex migratory path,  
97 which includes migration through the liver and lungs before returning to the small intestine<sup>24</sup>. At  
98 each of these anatomical sites, the migratory larvae cause strong inflammatory reactions. Studies in  
99 both the natural porcine host and murine models have shown that larvae elicit significant levels of  
100 type-2 (e.g. IL-5), but also type-1/17 (IL-6 and TNF $\alpha$ ) cytokines as they migrate in the liver, lungs  
101 and gut<sup>25, 26</sup>. Furthermore, *A. suum* infection has been shown to increase the susceptibility to  
102 bacterial lung infections in both mice and pigs<sup>27, 28</sup>.

103

104 The life cycle of *A. suum*, with larvae relocating between the intestines, the liver and the lungs,  
105 offers numerous sites of interaction with the immune system. In this respect, *A. suum* infections in  
106 pigs have proved useful for assessing the effects of different dietary components on type-2 immune  
107 function in both the gut and the respiratory tract. For example, studies in this model have shown  
108 that dietary retinoic acid can enhance *A. suum*-induced pulmonary eosinophilia, whilst treatment  
109 with probiotics, such as *Lactobacillus rhamnosus* GG, can suppress the prototypical type-2  
110 response in lymph nodes draining the lungs during infection<sup>29, 30</sup>. However, studies on the effects of  
111 concomitant PAC-supplementation and helminth infection are scant. Here, we explored the effect of  
112 dietary PAC on host immune function in *A. suum*-infected pigs. We examined the impact of PAC  
113 on systemic immune parameters, inflammatory and immune reactions at the mucosal barrier of both  
114 the lung and the intestinal tract, and infection- and dietary-induced changes in the gut microbiota.

115 Thus, the aim was to investigate how PAC consumption may modulate a naturally-induced type-2  
116 mucosal response in multiple tissue sites.

117

118

119

120

121

122

123

124

125

126

127

128

129

130

131

132

133

134

135

136

137

138

139

140

141

142

## 143 **Material and Methods**

144

### 145 **Proanthocyanidins and diets**

146 The PAC used for this study were from a standardized grape seed extract (Bulk Powders,  
147 Denmark). Based on LC-DAD-MS and LC-DAD-MS/MS analyses<sup>31, 32</sup>, the PAC purity of the  
148 extract was >95%. Further analysis of the PAC showed that they were composed of 99%  
149 procyanidin oligomers and polymers, with a mean degree of polymerization of 4.2. The basal diet  
150 (NAG, Denmark) was based on ground wheat and barley and was formulated to provide 16.2%  
151 crude protein (**Supplementary Table 1**). Pigs received either the basal diet or the basal diet  
152 supplemented with 1% PAC. Feed intake was adjusted for body weight throughout the experiment  
153 and was calculated to provide the PAC-supplemented pigs with approximately 300 mg PAC/kg  
154 BW. All pigs were weighed weekly and they were monitored and fed twice daily at 8:00 in the  
155 morning and 15:00 in the afternoon, with access to water *ad libitum*.

156

### 157 **Pig experiment**

158 9-weeks old pigs were selected from a Specific Pathogen Free (SPF) Danish farm with no history of  
159 helminth infection. On arrival, pigs were confirmed free of helminth-infection by fecal egg count  
160 and negative by serology for *A. suum*. Pigs were vaccinated (p.o.) against *Lawsonia intracellularis*  
161 4.5 weeks prior to the start of the experiment (ENTERISOL® ILEITIS VET., Boehringer  
162 Ingelheim). A total 24 pigs (Duroc/Danish Landrace/Yorkshire; 12 castrated males and 12 females)  
163 were randomly distributed into four treatment groups that were balanced for sex and initial  
164 bodyweight. Bodyweights were recorded weekly (**Supplementary Figure 1**). Each of the four  
165 groups were housed in two pens consisting of three pigs each. From day 1 of the experiment, 12  
166 pigs were fed the basal diet and 12 the PAC-supplemented diet. At day 14, half the pigs in each  
167 group were inoculated with 5000 embryonated *A. suum* eggs by gastric intubation (**Supplementary**  
168 **Figure 2**). Pigs were euthanized at day 28 of the experiment, i.e. day 14 post-infection, (p.i.) by  
169 captive bolt pistol stunning followed by exsanguination. Throughout the study, weekly blood and  
170 fecal samples were taken. Blood was collected by venipuncture of the jugular vein and serum  
171 separated and frozen at -80 °C. At necropsy, the entire small intestine was removed and processed  
172 for *A. suum* larval counts using a modified agar-gel technique<sup>33</sup>. Worm burdens were assessed by  
173 manual enumeration using a dissection microscope of blinded samples conserved in 70% ethanol.  
174 Digesta samples were collected from the proximal colon and cooled on ice before transfer to – 80

175 °C storage. Small pieces (1cm<sup>3</sup>) of lung (right cranial lobe) and mid-jejunal tissue were preserved in  
176 RNAlater. A further piece of jejunal tissue was also collected for histology using BiopSafe® Biopsy  
177 Sample System (Merit Medical). Histology slides were stained with hematoxylin & eosin, and  
178 eosinophils were enumerated by blinded microscopy.

179

### 180 **Broncho-Alveolar Lavage**

181 Broncho-alveolar lavage (BAL) was performed at necropsy by introducing 500 ml PBS into the  
182 lungs to recover BAL cells from both lung lobes. The BAL fluid was filtered through 2-layer fine  
183 gauze sheets into clean 50 mL centrifuge tubes, and stored at room temperature (RT) until further  
184 processing. The recovered cell suspensions underwent a series of washing with HBSS and  
185 centrifugation. To remove red blood cell (RBC) contamination the cell suspension was incubated  
186 for 5 minutes at RT in RBC lysis buffer (Sigma-Aldrich). Finally, the cells were resuspended in 5  
187 mL RPMI-1640 media supplemented with 10% foetal bovine serum and penicillin/streptomycin.  
188 Cells were enumerated and either used for flow cytometry (see below) or plated out on 48-well  
189 plates at a concentration of  $1.2 \times 10^5$  cells/well and incubated overnight (37 °C, 5% CO<sub>2</sub>). The next  
190 day, cells were stimulated with either excretory/secretory (E/S) products from either *A. suum* or  
191 *Trichuris suis*,  
192 or lipopolysaccharide (LPS; 500 ng/mL) for 24 hours. Following stimulation, the supernatant was  
193 collected and stored at – 20 °C before further analysis by ELISA.

194

### 195 **DNA extraction and 16S rRNA gene amplicon sequencing**

196 DNA from small and large intestine samples was extracted using Bead-Beat Micro AX Gravity Kit  
197 (A&A Biotechnology, Gdynia, Poland) as per manufacturer's instructions. The DNA purity and  
198 concentration were determined by NanoDrop 1000 Spectrophotometer (Thermo Fisher Scientific,  
199 USA) and Qubit™ 1x dsDNA high sensitivity kit on Varioskan Flash (Thermo Fisher Scientific,  
200 USA), respectively.

201 A 16S rRNA gene amplicon library was constructed by amplifying the 16S rRNA gene with unique  
202 molecular identifier (UMI) containing multiple forward and reverse primers (**Supplementary**  
203 **Table 2**). PCR conditions for the amplification were as follows: 95°C for 5 min, 2 cycles of 95°C  
204 for 20 s, 48°C for 30 s, 65°C for 10 s, 72°C for 45 s, and a final extension at 72°C for 4 min. A  
205 second PCR step was then performed to barcode PCR amplicons with the following conditions:  
206 95°C for 2 min followed by 33 cycles of 95°C for 20 s, 55°C for 20 s, 72°C for 40 s, and a final

207 extension at 72°C for 4 min. After each PCR reaction, PCR amplicons were cleaned up using  
208 SpeedBeads™ magnetic carboxylate (obtained from Sigma Aldrich). The size of barcoded PCR  
209 products (approximately 1500 bp) was checked by 1.5% agarose gel electrophoresis.

210 A sequencing library from pooled barcoded PCR products were prepared by following the ligation  
211 sequencing kit SQK-LSK110 (Oxford Nanopore Technologies, Oxford, UK) protocol. Next,  
212 prepared library was sequenced by Oxford Nanopore GridIONX5 sequencing platform as described  
213 in manufacturer's protocol (<https://nanoporetech.com/products/gridion>). Sequencing was run until  
214 there was no longer active pores.

215

### 216 **Data analysis workflow for 16S rRNA gene sequencing**

217 Nanopore sequencing software GridION version 21.02.5 (<https://nanoporetech.com>) was used for  
218 data collection. Base calling and demultiplexing of sequencing data were performed by ONT's  
219 Guppy version 4.5.2 (<https://nanoporetech.com>). Nanofilt version 2.7.1<sup>34</sup> was then used for filtering  
220 and trimming of demultiplexed sequences. Briefly, data were filtered on a minimum 1000 and  
221 maximum 1600 reads with a minimum average read quality score of 8. After filtering, 15  
222 nucleotides were trimmed from start and end of reads. Taxonomy assignment was achieved by  
223 using parallel\_assign\_taxonomy\_uclust.py script of Quantitative Insights into Microbial Ecology  
224 (QIIME) 1 version 1.8.0<sup>35</sup>. Greengenes database version 13.8 was used as a reference database<sup>36</sup>.

225 The reads classifications did not include UMI correction due to low coverage of UMI clusters.

226 QIIME 2 version 2020.6.0<sup>37</sup> was used to set rarefaction depth to 5000 reads per sample. Sample  
227 reads below 5000 were removed from the analysis; a total of 42 samples were included for  
228 microbiome analysis (n=19 for small intestine samples and n= 23 for large intestine samples).  
229 Normalized data were then processed in RStudio version 1.3.1073 using R version 4.0.2 and R  
230 packages phyloseq<sup>38</sup>, vegan<sup>39</sup>, tidyverse<sup>40</sup>, ggpubr<sup>41</sup>, reshape2<sup>42</sup> and viridis<sup>43</sup>.

231 Raw 16S rRNA sequence data is available at Sequence Read Archive ([www.ncbi.nlm.nih.gov/sra/](http://www.ncbi.nlm.nih.gov/sra/))  
232 under accession number PRJNA753018.

233

### 234 **Measurement of gut microbial metabolites**

235 Short-chain fatty acids and DL-lactic acid were analyzed in colonic digesta samples by GC-MS as  
236 previously described<sup>44</sup>.



237 **Flow-cytometry**

238 Tracheal-bronchial lymph nodes were collected from the bifurcature and stored on ice in FBS  
239 supplemented RPMI until further processing. Single-cell suspensions were prepared by passing  
240 lymph nodes through a 70  $\mu$ m cell-strainer. Cells were washed and stained with the following  
241 antibodies: mouse anti-pig CD3-FITC (clone BB23-8E6-8C8; BD Biosciences); mouse anti-pig  
242 CD4-PE-Cy7 (clone 74-12-4; BD Biosciences); mouse anti-human T-bet-APC (clone 4B10;  
243 BioLegend); mouse anti-human GATA3-PE (clone TWAJ; Invitrogen). BAL cells were collected as  
244 described above, and stained with mouse anti-pig granulocytes-Alexa Fluor647 (clone 2B2; Bio-  
245 Rad) and mouse anti-pig CD203a-FITC (clone PM18-7; Bio-Rad). Granulocytes were defined as  
246 2B2<sup>+</sup>CD203a<sup>-</sup>. For all stainings isotype controls were included and gates were set using FMO  
247 controls. Data was acquired on an Accuri C6 flow cytometer (BD Biosciences) and analyzed using  
248 C6 software.

249

250 **Enzyme-linked immunosorbent assay**

251 IL-1 $\beta$  and TNF $\alpha$  concentrations in alveolar macrophage supernatant and CRP levels in serum were  
252 analyzed using commercial ELISA kits (Duosets; R and D systems) according to the manufacturer's  
253 instructions. Levels of IgM, IgA and IgG<sub>1</sub> in serum specific for *A. suum* antigen were measured as  
254 previously described<sup>45</sup>.

255

256 **RNA-sequencing**

257 RNA was extracted from lung and intestinal tissue following homogenization (gentleMACS,  
258 Miltenyi Biotech) using miRNAeasy kits (Qiagen) according to the manufacturer's instructions.  
259 RNA was subsequently used for library preparation and 150bp paired-end Illumina NovaSeq6000  
260 sequencing (Novogene, Cambridge, UK). Sequence data was subsequently mapped to the Sus  
261 Scrofa (ss11.1) genome and read counts generated which were used to determine DEG using  
262 DEseq2. Pathway analysis was conducted using gene-set enrichment analysis (Broad Institute, MA,  
263 USA). RNA sequence data from lung and intestinal tissues are deposited at the NCBI Gene  
264 Expression Omnibus (Accession numbers: GSE174042 and GSE168840).

265

266 **Statistical analysis**

267 All statistical analysis was performed using GraphPad Prism 8, IBM SPSS Statistics 27 or R  
268 packages. The data were analyzed using a mixed-model analysis, with diet and infection status as

269 fixed factors and pen and pig as random factors, or with two-way ANOVA and t-tests, as indicated.  
270 Where appropriate, time was included as an additional fixed factor to account for repeated  
271 measures. One pig (in the *A. suum* + PAC group) was excluded from analysis as it displayed post-  
272 mortem pathology indicative of ileitis and aberrant values on several immunological assays.  
273 Shapiro-Wilk and Kolmogorov-Smirnov tests were used to tests for assumptions of normality in  
274 analyses, and square-root transformations were used to approximate normal distributions when  
275 appropriate. For gut microbiota  $\alpha$ -diversity analysis, pairwise Wilcoxon Rank Sum Test from the R  
276 package was used to obtain Benjamin–Horchberg corrected p-values. Statistical analysis for  
277 distance-based redundancy analysis (db-RDA) was done by using permutational ANOVA in the R  
278 package vegan. Volcano Plots were created using VolcanoR<sup>46</sup>, and principal component analysis  
279 was carried out using ClustVis<sup>47</sup>.

280

281

282

283

284

285

286

287

288

289

290

291

292

293

294

295

296

297

298

299

300

301

302

303

## 304 **Results**

305

### 306 **Proanthocyanidins exert minor effects on systemic antibody and inflammatory biomarkers**

307 Acute infections with *A. suum* induce potent immune reactions in the lungs and intestine before  
308 expulsion of the majority of the invading larvae starting from around day 18 p.i.<sup>48</sup>. We fed pigs  
309 either a control diet or a diet supplemented with 1% PAC for 14 days, before half the pigs in each  
310 group were infected with 5000 embryonated *A. suum* eggs. Mean larval burdens at day 14 p.i. were  
311 not altered by PAC supplementation (2914 larvae  $\pm$  928 larvae (mean  $\pm$  SD,  $n = 6$ ) in control-fed  
312 pigs and 3155  $\pm$  1057 larvae (mean  $\pm$  SD,  $n = 5$ ) in PAC fed pigs). In order to examine whether  
313 PAC influenced the development of the immune response to *A. suum*, we first examined serological  
314 markers of infection in the different treatment groups. *A. suum* infection resulted in a significant  
315 increase in serum IgM, IgA, IgG1 specific for *A. suum* antigenic extracts compared to un-infected  
316 groups (**Figure 1A-C**). PAC supplementation increased the levels of all three antibody classes in  
317 infected pigs, however the effect of diet was not statistically significant. To assess the effect of both  
318 *A. suum* and dietary PAC on systemic inflammation, we quantified C-reactive protein (CRP) levels  
319 in serum. CRP levels on day 0 p.i. (i.e. after 14 days of PAC supplementation) were significantly  
320 lower in PAC fed pigs compared to controls (**Figure 1D**). However, CRP levels measured on day  
321 14 p.i. (i.e. after 28 days of PAC supplementation) were no longer affected by diet, and infection  
322 had no impact on CRP levels (**Figure 1E**). Thus, whilst dietary PAC appeared to exert transient  
323 anti-inflammatory properties in uninfected pigs, PAC had little capacity to alter systemic antibody  
324 production induced by infection.

325

### 326 **Impact of *Ascaris suum* infection and dietary proanthocyanidins on Th1, Th2 and 327 granulocytic responses in pulmonary and gut tissues**

328 *A. suum* infection induced significant cellular changes in the BAL fluid and tracheal-bronchial  
329 lymph nodes (LN). In the LN, the proportion of CD3<sup>+</sup> T cells was significantly decreased when  
330 comparing infected pigs to controls, similar to what has been observed in mice<sup>25</sup> (**Figure 2A**). The  
331 proportions of CD3<sup>+</sup>CD4<sup>+</sup>, CD3<sup>+</sup>CD4<sup>+</sup>T-bet<sup>+</sup> (Th1) and CD3<sup>+</sup>CD4<sup>+</sup>GATA3<sup>+</sup> (Th2) T-cells were not  
332 significantly different across treatment groups, however Th2/Th1 ratios clearly demonstrated a  
333 strong Th2-polarized immune response as a result of *A. suum* infection (**Figure 2B-E**). Moreover,

334 infection markedly induced granulocytosis in BAL fluid, and eosinophilia in jejunal tissues. PAC  
335 did not alter granulocyte numbers in BAL, and whilst intestinal eosinophils were numerically higher  
336 in infected pigs fed PAC compared to those fed the control diet this difference was not significant  
337 (**Figure 2F-G**). Taken together, these findings indicate that *A. suum* induced a strong type-2 biased  
338 cellular response in the lungs and intestinal tissues, which was not significantly altered by  
339 concurrent PAC consumption.

340

341 **Concomitant *Ascaris suum* infection and dietary proanthocyanidins tend to enhance cytokine**  
342 **secretion in alveolar macrophages stimulated *ex vivo***

343 To further assess the effects of infection and dietary PAC on the profile of lung immune cells,  
344 alveolar macrophages were isolated from BAL of all pigs in each treatment group and stimulated *ex*  
345 *vivo*. Cells were first stimulated with LPS to assess how diet and infection may influence secretion  
346 of the pro-inflammatory cytokines TNF $\alpha$  and IL-1 $\beta$ . Infection status did not significantly influence  
347 LPS-induced secretion of these cytokines. Whilst levels of LPS-induced TNF $\alpha$  and IL-1 $\beta$  were  
348 lower in uninfected pigs fed PAC, the secretion of these cytokines tended to be higher in infected  
349 pigs fed PAC, albeit not significantly so ( $p = 0.15$  for interaction between diet and infection status;  
350 **Figure 2H**). To explore if *ex vivo* inflammatory responses to parasite antigens were modulated by  
351 PAC or infection, macrophages were first stimulated with *A. suum* E/S products, however no  
352 cytokine secretion was observed (data not shown). We therefore also stimulated cells with E/S from  
353 another porcine helminth, *T. suis*, which we have previously shown to be a stronger activator of  
354 innate cytokine production<sup>49</sup>. Interestingly, alveolar macrophages isolated from infected pigs  
355 secreted significantly higher levels of TNF $\alpha$  when activated with *T. suis* E/S products (**Figure 2I**).  
356 Similarly to LPS-stimulated cells, macrophages isolated from infected pigs fed PAC secreted higher  
357 levels of TNF $\alpha$  and IL-1 $\beta$  compared to macrophages isolated from any other treatment groups,  
358 albeit not significantly (**Figure 2I**). These findings suggest that *A. suum* infection primed  
359 macrophages to be more responsive to stimulation from heterologous parasite antigens (but not  
360 LPS), whilst PAC has only minor systemic immuno-stimulatory effects on cytokine production  
361 during infection.

362

363 **Transcriptional profiling of gut and lung tissues reveals modulatory effects of**  
364 **proanthocyanidins during *Ascaris suum* infection**

365 *Jejunum transcriptional responses*

366 To explore in more detail if PAC may influence the immunological response to *A. suum* infection,  
367 we conducted RNA-sequencing of jejunal and lung tissues. Both *A. suum* and PAC treatment  
368 strongly modulated gene expression in the intestine as compared to controls (**Figure 3 and 4**).  
369 Principal component analysis showed a clear clustering of biological replicates according to  
370 infection status (**Figure 3A**). *A. suum* infection significantly downregulated the expression of genes  
371 such as the aldehyde dehydrogenase-encoding *ALDH1B1*, and the sodium-channel encoding  
372 *SCN8A*. Interestingly, three of the top-ten downregulated genes as a result of infection were related  
373 to circadian rhythm (*PER3*, *PER2*, *NOCT*) (**Figure 3B-C**). Moreover, *A. suum* infection  
374 significantly upregulated the expression of interleukins *IL4*, *IL9*, *IL10*, *IL21*, the eosinophil marker  
375 *EPX*, as well as TCR related genes *CD28* and *CD80* in intestinal tissue. Furthermore, we noted  
376 strong upregulation of genes involved in aryl hydrocarbon receptor (AHR)-signaling including  
377 *ARNTL* as well as smooth muscle contraction (*P2RX1*), which may relate to the increased intestinal  
378 motility observed during the immune reaction to *A. suum* larvae<sup>50</sup> (**Figure 3B-C**). Analysis of gene  
379 pathways modulated by infection revealed that pathways related to peroxisome function, as well as  
380 the metabolism of fatty acids and glycerolipids were significantly suppressed, suggesting a  
381 profound modulation of nutrient metabolism due to larval colonization of the intestine (**Figure 3D**).  
382 Unsurprisingly, the main up-regulated gene pathways were related to immune function, such as the  
383 IL-2, IL-4, and T-cell receptor related pathways, as well as granulocyte and B-cell signaling  
384 (**Figure 3D**). Thus, consistent with the pulmonary and intestinal eosinophilia, *A. suum* induced a  
385 type-2 inflammatory reaction concomitant with pathophysiological responses related to the changed  
386 mucosal environment induced by larval antigens.

387

388 In uninfected pigs, dietary PAC resulted in a distinct clustering of treatment groups based on diet as  
389 assessed by principal component analysis (**Figure 4A**). Downregulated genes included the glucose  
390 transporter *SLC2A7*, which has previously been shown to be inhibited by polyphenols in cellular  
391 models<sup>51</sup>, as well as *MT-2B*, encoding a metallothionein protein known to be associated with  
392 intestinal inflammation and oxidative stress in mice<sup>52</sup>. Interestingly, we also noted downregulation  
393 of *EGFR*, encoding the epidermal growth factor receptor (**Figure 4B-C**). Significantly upregulated  
394 genes included *TXNRD1*, encoding thioredoxin reductase 1, a protein involved in suppression of

395 reactive oxygen species (ROS), as well as genes involved in cellular endocytic processes (*RAB7A*)  
396 and extracellular matrix remodeling (*COL6A5*) (**Figure 4C**). Consistent with this, gene pathways  
397 related to metabolic processes, such as translation elongation and ribosome function, were  
398 significantly enriched (**Figure 4D**). Interestingly, we noted that a number of pathways that were  
399 related to immune function (and that were also induced by *A. suum*), were upregulated by PAC.  
400 These included pathways related to granulocyte function and B-cell signaling, indicative of an  
401 immune-stimulatory effect of PAC. Furthermore, we observed a significant upregulation of  
402 pathways related to both detoxification of ROS and selenoamino acid metabolism, suggestive of  
403 enhanced antioxidant responses in PAC-fed pigs. Notably, we also observed a strong  
404 downregulation of pathways related to heat shock responses, which are normally induced by  
405 cellular stressors and offer protection against tissue injury<sup>53</sup> (**Figure 4D**). Collectively, these data  
406 suggest that dietary PAC have significant effects on intestinal metabolism and function as a  
407 cytoprotective agent in the intestinal mucosa, by inducing antioxidant responses and regulating  
408 responses to cellular stressors.

409

410 Given that PAC appeared to induce transcriptional pathways with functions in immunity and  
411 inflammation, we next asked whether concurrent PAC consumption could modulate the intestinal  
412 transcriptomic response to *A. suum* infection. We observed that within infected pigs, there was once  
413 again a clear clustering according to diet based on principal component analysis (**Figure 5A**).  
414 Inspection of genes differentially expressed in infected, PAC-fed pigs, relative to infected pigs fed  
415 the control diet, revealed that expression of genes involved in intestinal nutrient metabolism were  
416 increased, such as *ORAI2* and *AGTRI*, which both play a role in calcium uptake<sup>54, 55</sup>. Consistent  
417 with the suppression of *EGRF* expression in uninfected pigs fed PAC, the expression of a number  
418 of genes related to EGF signaling, including *BTC* and *AREG*, were downregulated. *AREG* encodes  
419 amphiregulin, a cytokine involved in type-2 inflammation induced by a number of different  
420 helminth species<sup>56</sup> (**Figure 5B**). In agreement with the data showing an enrichment of antioxidant  
421 pathways in uninfected pigs fed PAC, we noted that PAC supplementation during infection also  
422 resulted in the upregulation of the oxidative stress pathway, which included significant enrichment  
423 of *SOD3*, *GPX3* and *NQO1* - genes encoding proteins with known anti-oxidant properties (**Figure**  
424 **5C**). Down-regulated pathways in infected pigs fed PAC were mainly related to metabolic activity  
425 such as cholesterol metabolism, but these were not significant following FDR adjustment (data not  
426 shown). Collectively, these data show that PAC exert a significant influence on the intestinal

427 transcriptional environment during enteric helminth infection mainly by promoting the transcription  
428 of genes involved in regulating oxidative stress and nutrient metabolism.

429

### 430 ***Lung transcriptional responses***

431 Next, transcriptional profiling of the lungs by RNA-sequencing was performed to investigate the  
432 effect of larval migration in the lungs and the potential impact of dietary PAC on gut-lung interplay.  
433 In comparison to the intestine, the modulation of gene expression in the lungs was only modestly  
434 modulated by both *A. suum* infection and/or PAC supplementation. Interestingly, as was the case in  
435 the jejunum, *A. suum* infection regulated the expression of numerous genes related to circadian  
436 rhythm. Notably, *PER1*, *PER2*, *PER3*, *NR1D1*, *NR1D2* and *DBP* were suppressed, whereas *NPAS2*,  
437 *ARNTL* were significantly upregulated (**Figure 6A**). A number of studies have touched upon the  
438 importance and complex interplay between circadian rhythm, immune regulation and parasite-host  
439 interactions<sup>57</sup>. Of note, *ARNTL* was also significantly upregulated by PAC (**Figure 6B**). In  
440 coherence with the above described granulocytosis in the lungs in BAL fluid, *A. suum* infection  
441 upregulated the expression of *CCR3*, which is essential for eosinophil recruitment. Infected pigs fed  
442 PAC had significantly higher expression levels of genes related to innate immune function (*CD209*  
443 and *OAS2*), and connective tissue growth factor (*CTGF*) in lung tissues compared to infected pig  
444 fed a control diet (**Figure 6C**). *CTGF* is involved in wound repair and tissue healing, suggesting a  
445 protective effect of PAC during *A. suum* infection. Intriguingly, the expression of the oxidative  
446 stress inducer *ALOX15* was significantly increased by *A. suum* infection, but was significantly  
447 down-regulated in infected pigs fed a PAC diet, which supports previously described reports of  
448 PAC acting as a lipoxygenase inhibitor<sup>58</sup> (**Figure 6A and C**). Thus, *A. suum* infection induced  
449 marked transcriptional responses in the lungs but somewhat less than compared to intestinal tissues,  
450 which may indicate that lung homeostasis is somewhat restored by day 14 p.i. when the migrating  
451 larvae have returned to the intestine. Furthermore, dietary PAC induced smaller transcriptional  
452 changes in the lung compared to the intestine but may ameliorate wound healing and antioxidant  
453 status during infection.

454

### 455 ***Ascaris suum* infection and proanthocyanidins alter gut microbiota composition with limited** 456 **effect on short chain fatty acids**

457 Previous studies have indicated that immunomodulatory and anti-inflammatory effects of PAC may  
458 derive from changes in the GM and associated metabolite production<sup>17</sup>. Furthermore, *A. suum* and

459 other helminths can markedly change host GM composition<sup>59</sup>. Therefore, to explore whether the  
460 observed transcriptomic changes induced by diet and infection were accompanied by GM changes,  
461 we used 16S rRNA gene amplicon sequencing to characterize both the small and large intestinal  
462 GM composition. We initially analyzed the GM composition in the jejunum, at the main site of  
463 *Ascaris* infection. Neither *A. suum* nor dietary PAC altered  $\alpha$ -diversity (data not shown). Changes in  
464  $\beta$ -diversity were apparent primarily as a result of *A. suum* infection ( $p < 0.05$  by distance-based  
465 redundancy analysis; **Figure 7A**), with differential abundance analysis on genus level indicating an  
466 enrichment in *Lactobacillus* spp. in infected pigs (**Figure 7B**). Moreover, *A. suum* infection  
467 decreased the abundance of *Facklamia* spp. ( $p = 0.053$  by mixed model analysis; **Figure 7C**). In  
468 contrast, PAC did not have a significant effect on the small intestinal GM, with no changes in  $\beta$ -  
469 diversity between PAC-fed pigs and control pigs ( $p > 0.05$  by distance-based redundancy analysis;  
470 **Figure 7A**). However, we did note that, within *A. suum*-infected pigs, those animals fed PAC  
471 tended to have a higher abundance of amplicon sequences corresponding to *Limosilactobacillus*  
472 *reuteri* (**Figure 7D**). *L. reuteri* has been associated with beneficial probiotic and anti-inflammatory  
473 effects, and plays a role in the prevention of microbial translocation and inhibits colonization of  
474 pathogenic bacteria<sup>60, 61</sup>.

475

476 In the colon, we found that PAC had the largest effect on the GM composition, consistent with the  
477 notion that PAC are extensively metabolized by, and can modulate, the large intestine microbiome  
478 ( $p < 0.05$  for  $\beta$ -diversity comparison between PAC and control group by distance-based redundancy  
479 analysis; **Figure 8A- B**). PAC tended to decrease the abundance of *Bifidobacterium* in both naïve  
480 and infected pigs (**Figure 8C**). Notably, the abundance of sequences closely related to  
481 *Bifidobacterium thermacidophilum* was significantly increased by *A. suum*, but concomitant PAC  
482 supplementation significantly suppressed this effect (**Figure 8D**). The reduction of *Bifidobacterium*  
483 in pigs fed PAC contrasts to a previous study in pigs showing that PAC increased the growth of this  
484 taxa<sup>15</sup>. However, similar to the trend in the small intestine, PAC supplementation resulted in the  
485 significant increase of *L. reuteri* abundance in the colon of both naïve and infected pigs (**Figure**  
486 **8E**). Interestingly, *A. suum* infection increased the abundance of *Lactobacillus* spp. in the colon  
487 whilst significantly decreasing the abundance of *Turicibacter* spp. (**Figure 8F and G**). However,  $\beta$ -  
488 diversity was not different between *A. suum* and control groups in colon, indicating that the effects  
489 of infection on GM composition were mostly limited to the predilection site (the small intestine).  
490 Finally, we investigated if the colonic GM changes were accompanied by changes in the



491 concentrations of SCFA in the distal colon. Neither PAC nor *A. suum* infection altered levels of  
492 acetic acid, propionic acid, n-butyric acid or D-lactic acid (**Supplementary Figure 3**). However,  
493 we observed that dietary PAC decreased the concentrations of the branched-chain fatty acids iso-  
494 valeric acid ( $p < 0.05$ ) and iso-butyric acid ( $p = 0.0616$ ), which may relate to altered protein  
495 metabolism or colonic transit time<sup>62</sup>, and is consistent with our previous work on pigs fed a  
496 polyphenol-enriched diet<sup>63</sup> (**Figure S1**). Taken together, these results indicate distinct effects of *A.*  
497 *suum* infection and PAC on specific bacteria taxa in a site-specific manner.

498

499

## 500 **Discussion**

501

502 The immuno-modulatory effects of PAC have been investigated in numerous studies but their mode  
503 of action and impact on immune function is still not fully understood. Furthermore, only limited  
504 knowledge has been attained on the effects of PAC on type-2 immune response, which plays a  
505 central role during helminth infections and may be relevant for inflammatory disorders, such as  
506 food allergies and ulcerative colitis. Therefore, we used here a model of *A. suum* infection in pigs,  
507 which offers a unique opportunity to explore the modulation of parasite-induced inflammation in  
508 multiple tissues by dietary components.

509

510 Initial assessment of the systemic effects of PAC and *Ascaris* infection were demonstrated by  
511 monitoring serum antibody levels and the acute-phase protein CRP, a marker for systemic  
512 inflammation. *A. suum* infection resulted in a significant increase in serum antibodies, which were  
513 further enhanced by dietary PAC, albeit not significantly. Interestingly, significantly lower CRP  
514 levels were observed after 14 days of PAC supplementation, although this effect subsided by the  
515 end of the study. Thus, PAC had limited effects on parasite-induced antibody levels, and prolonged  
516 PAC supplementation did not appear to persistently alter inflammatory markers in serum.

517

518 The gut-lung axis is gaining increasing interest in numerous research fields, and the migratory  
519 characteristics of *A. suum* render the investigation of gut-lung interplay greatly relevant in this  
520 model. Here, we showed that *A. suum* infection induced granulocytosis in the lungs, and a Th2  
521 polarized immune response was clearly demonstrated by Th2/Th1 T-cell ratios. PAC and *A. suum* in

522 isolation, upregulated a number of similar genes, notably genes related to the circadian rhythm,  
523 such as *ARNTL*. Interestingly, a recent study showed that *ARNTL*, also known as *BMLAI*, was  
524 fundamental for the time-of-the-day dependent expulsion efficiency of *Trichuris muris* infection in  
525 mice<sup>64</sup>. Furthermore, a study conducted in pigs also demonstrated an association between *ARNTL*  
526 and adult worm burden<sup>65</sup>. However, in contrast to murine studies, which have demonstrated a role  
527 for PAC in suppressing allergic responses in the lungs, we did not find a modulatory effect of PAC  
528 on the type-2 cellular response to *A. suum* infection. *Ex vivo* stimulation of lung macrophages by  
529 LPS or helminth antigens indicated a tendency of higher cytokine secretion levels in macrophages  
530 isolated from infected pigs fed PAC. Moreover, although we observed transcriptional changes in the  
531 lungs of infected pigs that are reflective of type-2 inflammation, these did not appear to be  
532 markedly altered by concurrent PAC intake. The exception was an indication of regulation of  
533 several genes such as *CTGF*, and *ALOX15*, which could suggest that PAC may augment wound-  
534 healing and anti-oxidant status in lung tissues during *A. suum* infection. Thus, in our model, dietary  
535 PAC had limited capacity to regulate lung immune function during helminth infection, although  
536 further studies to elucidate whether PAC may potentiate protection towards secondary airway  
537 infection during *A. suum* infection may be relevant.

538

539 We next assessed the impact of *A. suum* infection and PAC at the predilection site of infection, the  
540 small intestine. *A. suum* infection induced stereotypical intestinal eosinophilia, which was  
541 equivalent in both dietary groups. We had previously shown that eosinophilia in the jejunum of *A.*  
542 *suum*-infected pigs could be potentiated by a polyphenol-enriched diet containing 5 % grape  
543 pomace<sup>63</sup>. Grape pomace may contain several phytonutrients and fibrous components such as  
544 lignin, which could contribute to synergistic effects, whereas the PAC diet in the present study was  
545 composed only of purified PAC oligomers from grape seed extract. This may explain the  
546 discrepancy between these results. Transcriptomic analysis of intestinal tissues revealed that a  
547 number of genes and pathways were regulated by both infection and PAC supplementation. As  
548 expected, *A. suum* induced the upregulation of type 2 immune related genes and pathways, as well  
549 as having an important impact on nutrient metabolism-related genes. Notably, PAC and *A. suum* in  
550 isolation were both able to modulate transcriptional pathways related to immune function and  
551 antioxidant activity. Interestingly, PAC increased the expression of protein-encoding genes with  
552 cytoprotective functions against oxidative stress, suggesting a role in improving gut health by  
553 minimizing cellular stress during inflammation. The antioxidant effect of PAC could be caused by

554 the absorption of PAC-derived metabolites, produced as a result of microbial metabolism. Although  
555 PAC are known to remain relatively stable until they reach the large intestines, PAC molecules with  
556 low mDP may also be absorbed in the small intestines<sup>66, 67</sup>. Furthermore, PAC and their metabolites  
557 may exert direct interactions with the gut mucosa and thus epithelial cells, as described in numerous  
558 cell-based studies. PAC may intervene as scavengers of free radicals due to the hydroxyl groups  
559 present in their molecular structures, which can neutralize free radicals via electron delocalization<sup>5</sup>.  
560 Another mechanism of the protective effects of PAC, may be via the induction of cellular  
561 antioxidant defenses by modulating Nuclear factor erythroid 2-related factor 2 (Nrf2)-related genes,  
562 which play an important role in regulating cellular resistance to oxidants, such as ROS<sup>68</sup>.

563

564 The localized effect of PAC and infection in the intestines was also demonstrated by their impact on  
565 the GM. *A. suum* infection caused substantial changes in the GM composition, most notably in the  
566 small intestine. This is the first report of alterations in the GM by *Ascaris* in the predilection site of  
567 the jejunum, and we found a significantly decreased abundance of *Facklamia* spp. Furthermore, we  
568 noted that *A. suum* increased the abundance of lactobacilli in the colon. Consistent with this, an  
569 increased abundance of lactobacilli has also been associated with *Heligmosomoides polygyrus*  
570 infection in mice<sup>69, 70</sup>. This may potentially result from the increased mucus secretion that is a  
571 stereotypical feature of helminth infections which may provide a niche environment for lactobacilli  
572 to thrive<sup>71</sup>. Interestingly, the abundance of *L. reuteri* was significantly increased by PAC  
573 supplementation in both naïve and infected pigs, suggesting a prebiotic effect, which may have  
574 functional implications, given the known role of *L. reuteri* in modifying inflammation. However,  
575 PAC also significantly decreased the abundance of *Bifidobacterium* spp., including *B.*  
576 *thermacidophilum*, suggesting a complex regulation of the GM. Notably, the suppressive effect of  
577 PAC on *Bifidobacterium* spp. stands in contrast to a previous study showing the opposite effect in  
578 pigs fed PAC derived from cocoa<sup>15</sup>. These apparently contradictory findings may potentially be  
579 explained by the differing molecular structures of PAC derived from different sources, as well as  
580 potential interactions with differing basal diets. Given that PAC appeared to change the GM  
581 composition, a key question is whether the immunomodulatory effects of PAC in the intestine  
582 derive from direct interactions with PAC and mucosal immune cells during intestinal transit, or  
583 whether PAC-derived microbial metabolites are absorbed and exert systemic bioactivity, as has  
584 been proposed in previous studies<sup>11, 15</sup>. Given that PAC-related transcriptional changes we observed  
585 were localized mainly to the gut, and not the lung, this may support a hypothesis that the activities

586 were derived from direct interactions between PAC and cells at the level of the gut mucosa,  
587 consistent with a lack of an effect of PAC on SCFA levels. However, further studies are clearly  
588 needed to unravel these mechanistic aspects.

589

590 In conclusion, pigs infected with *A. suum* offered a robust model to study the effect of PAC on  
591 pathogens that induce a strong, type-2 biased mucosal immune response in pulmonary and intestinal  
592 tissues. Both *A. suum* infection and PAC in isolation had similar immunomodulatory capacity,  
593 notably by modulating gene pathways related to B-cell function. PAC also affected transcriptional  
594 pathways related to oxidative stress by significantly increasing the expression levels of protein-  
595 encoding genes with cytoprotective properties. However, the canonical markers of type-2  
596 inflammation, such as eosinophilia and Th2 T-helper cells in the lungs, were not modulated by PAC  
597 intake. The limited effects of dietary PAC observed in the lungs is in coherence with a previous  
598 study demonstrating no effect of PAC on gene expression levels of various immune-related genes in  
599 alveolar macrophages and tracheobronchial lymph nodes isolated from *A. suum* infected pigs, which  
600 were dosed with PAC derived from cocoa<sup>29</sup>. Thus, in contrast to some murine studies suggesting  
601 beneficial effects of dietary PAC on asthma, our results suggest a restricted ability of PAC to  
602 influence the development of Th2 responses in the respiratory tract in pigs. However, the significant  
603 modulatory effects of PAC on porcine intestinal gene expression suggest a primarily gut-localized  
604 effect of PAC. Thus, PAC may play a role in maintaining gut health during enteric infection in pigs  
605 and humans, and further studies to address the functional implications of this diet-infection  
606 interaction are highly warranted.

607

608

609

610

611

612

613

614

615

616

617

618

619

620

621

622

## 623 **Acknowledgements**

624 The authors would like to thank Mette Marie Schjelde for excellent laboratory assistance and  
625 Charlotte Smith Bonde, Lise-Lotte Christiansen, Penille Jensen, Stine Nielsen and Pankaj Arora for  
626 assistance with the animal study.

627

## 628 **Funding**

629 This work was funded by the Independent Research Fund Denmark (Grant # 7026-0094B).

630

## 631 **Conflict of interest**

632 The authors declare no conflicts of interests regarding this study.

633

## 634 **Ethical statement**

635 All experiments involving animals were conducted in agreement with the Danish legislation and the  
636 Danish Animal Experiments Inspectorate with the license number 2015-15-0201-0076.

637

638

639

640

641

642

643

644

645

646

647

648

649

650

651

652

653

## 654 **Figure Legends**

655

### 656 **Figure 1 - Dietary proanthocyanidins exert limited effects on systemic antibody levels and** 657 **inflammatory biomarkers**

658 Serum levels of **A)** IgM, **B)** IgG1 and **C)** IgA specific for *Ascaris suum* antigen on day -14 pre-  
659 infection (i.e. day of arrival) and day 14 post-infection (p.i.) with *A. suum*. **D)** C-reactive protein  
660 (CRP) levels at day 0 p.i. (i.e. after 14 days of proanthocyanidin (PAC) supplementation) and **E)**  
661 day 14 p.i. (**Mixed model analysis or t test, \* $p < 0.05$ , \*\* $p < 0.01$ , \*\*\* $p < 0.001$ ,  $n = 6$  pigs per**  
662 **group, except  $n = 5$  pigs in PAC+A. *suum* group, and  $n=12$  pigs per group in Panel D prior to *A.***  
663 ***suum* infection).**

664

665

### 666 **Figure 2 - Effects of *Ascaris suum* infection and dietary proanthocyanidins on cellular** 667 **responses in the lungs and intestine**

668 **A-E)** Proportions of CD3<sup>+</sup> cells, CD4<sup>+</sup> T cells, T-bet<sup>+</sup> Th1 cells , GATA3<sup>+</sup> Th2 cells , and Th1/Th2  
669 ratios in lung lymph nodes (LN) on day 14 post-infection (p.i.). **F)** Lung granulocytosis in broncho-  
670 alveolar lavage (BAL) fluid at day 14 p.i. **G)** Eosinophils in mid-jejunum tissues at day 14 p.i.)  
671 TNF $\alpha$  and IL-1 $\beta$  secretion *ex vivo* in alveolar macrophages stimulated with lipopolysaccharide  
672 (LPS) (**H)** or *Trichuris suis* antigens (**I**). PAC: proanthocyanidins (**Mixed model analysis,**  
673 **\* $p < 0.05$ , \*\* $p < 0.01$ , \*\*\* $p < 0.001$ , \*\*\*\* $p < 0.0001$ ,  $n = 5-6$  pigs per group).**

674

### 675 **Figure 3 - Modulation of gene expression and transcriptional pathways in intestinal tissue by** 676 ***Ascaris suum* infection**

677 **A)** Clustering of *A.suum*-infected and control groups as demonstrated by principal component  
678 analysis. **B)** Volcano plot showing differentially expressed genes resulting from *A. suum* infection

679 **C)** Top ten up- and down-regulated genes identified as a result of *A. suum* infection. ( $n = 6$  pigs per  
680 group). **D)** Significantly up- and down-regulated pathways ( $p < 0.01$ ;  $Q < 0.1$ ) identified by gene-  
681 set enrichment analysis as a result of *A. suum* infection.

682

683

684

685 **Figure 4 - Modulation of gene expression and transcriptional pathways in intestinal tissue by**  
686 **dietary proanthocyanidins**

687 **A)** Clustering of the two dietary groups as demonstrated by principal component analysis in  
688 uninfected pigs. **B)** Volcano plot showing differentially expressed genes resulting from dietary  
689 proanthocyanidin (PAC) supplementation. **C)** Top ten up- and down-regulated genes identified as a  
690 result of dietary PAC supplementation in uninfected pigs. ( $n = 6$  pigs per group). **D)** Significantly  
691 up- and down-regulated pathways ( $p < 0.01$ ;  $Q < 0.1$ ) identified by gene-set enrichment analysis  
692 (GSEA) as a result of dietary PAC supplementation. Highlighted are the HSF1 Dependent  
693 Transactivation and Detoxification of ROS pathways, showing enriched genes as identified by  
694 GSEA analysis.

695

696 **Figure 5 - Modulation of gene expression and transcriptional pathways in intestinal tissue by**  
697 **dietary proanthocyanidin supplementation in *Ascaris suum*-infected pigs**

698 **A)** Clustering of the dietary groups within *Ascaris suum*-infected pigs as a result of dietary  
699 proanthocyanidins (PAC) as demonstrated by principal component analysis. **B)** Volcano plot  
700 showing differentially expressed genes resulting from dietary PAC supplementation in *A. suum*-  
701 infected pigs. **C)** Top ten up- and down-regulated genes identified as a result of dietary PAC  
702 supplementation in *A. suum*-infected pigs. ( $n = 6$  pigs in *A. suum* group,  $n = 5$  pigs in PAC+*A. suum*  
703 group).

704

705 **Figure 6 - Modulation of gene expression in lung tissue by *Ascaris suum* infection and dietary**  
706 **proanthocyanidins**

707 Effects on lung gene expression as shown by principal component analysis, volcano plot of  
708 differentially expressed genes and top ten up- and down-regulated genes identified as a result of **A)**  
709 *Ascaris suum* infection in pigs fed the control diet, **B)** dietary proanthocyanidins (PAC) in naïve

710 pigs and C) dietary PAC in *A. suum*-infected pigs. ( $n = 6$  pigs per group, except  $n = 5$  pigs in  
711 PAC+A. *suum* group).

712

713

714

715

716 **Figure 7 - Changes in gut microbiota composition in the small intestine due to dietary**  
717 **proanthocyanidins and *Ascaris suum* infection**

718 A) Changes in  $\beta$ -diversity in the small intestine, as identified by distance-based redundancy analysis  
719 where a significant effect of *Ascaris suum* compared to all other treatment groups was identified.

720 No effect on  $\beta$ -diversity was reported when comparing PAC to control-fed naïve pigs B) Relative

721 abundance at genus level in naïve or *A. suum*-infected pigs fed a control diet or PAC-supplemented

722 diet. Relative abundance of C) *Facklamia* spp. and D) *Limosilactobacillus reuteri* in naïve or *A.*

723 *suum*-infected pigs fed a control diet or PAC-supplemented diet, as identified by differential

724 abundance analysis and mixed-model analysis. ( $n = 3$  pigs in control group,  $n = 6$  pigs in *A. suum*

725 group,  $n = 6$  pigs in PAC group, and  $n = 5$  pigs in PAC+A. *suum* group).

726

727 **Figure 8 - Changes in gut microbiota composition in the proximal colon due to dietary**  
728 **proanthocyanidins and *Ascaris suum* infection**

729 A) Changes in  $\beta$ -diversity in the proximal colon as identified by distance based redundancy  
730 analysis, where an effect of proanthocyanidins (PAC) compared to control was identified.. B)

731 Relative abundance at genus level in naïve or *Ascaris suum*-infected pigs fed a control diet or PAC-

732 supplemented diet. Relative abundance of C) *Bifidobacteria* spp., D) *B. thermacidophilum*, E)

733 *Limosilactobacillus reuteri*, F) *Lactobacillus* spp. and G) *Turicibacter* spp. in naïve or *A. suum*-

734 infected pigs fed a control diet or PAC-supplemented diet, as identified by differential abundance

735 analysis and mixed-model analysis (\* $p < 0.05$ ). ( $n = 6$  pigs per group, except  $n = 5$  pigs in PAC+A.

736 *suum* group).

737

738

739

740

741



742

743

744

745

746

747

748

## References

749

- 750 1. C. Gupta and D. Prakash, Phytonutrients as therapeutic agents, *Journal of Complementary and*  
751 *Integrative Medicine*, 2014, **11**, 151-169.
- 752 2. D. E. Roopchand, R. N. Carmody, P. Kuhn, K. Moskal, P. Rojas-Silva, P. J. Turnbaugh and I. Raskin,  
753 Dietary Polyphenols Promote Growth of the Gut Bacterium *Akkermansia muciniphila* and Attenuate  
754 High-Fat Diet-Induced Metabolic Syndrome, *Diabetes*, 2015, **64**, 2847-2858.
- 755 3. L. Jahns, Z. Conrad, L. K. Johnson, L. D. Whigham, D. Wu and K. J. Claycombe-Larson, A diet high in  
756 carotenoid-rich vegetables and fruits favorably impacts inflammation status by increasing plasma  
757 concentrations of IFN- $\alpha$ 2 and decreasing MIP-1 $\beta$  and TNF- $\alpha$  in healthy individuals during a  
758 controlled feeding trial, *Nutr Res*, 2018, **52**, 98-104.
- 759 4. S. Adriouch, A. Lampuré, A. Nechba, J. Baudry, K. Assmann, E. Kesse-Guyot, S. Hercberg, A. Scalbert,  
760 M. Touvier and L. K. Fezeu, Prospective Association between Total and Specific Dietary Polyphenol  
761 Intakes and Cardiovascular Disease Risk in the Nutrinet-Santé French Cohort, *Nutrients*, 2018, **10**.
- 762 5. C. González-Quilen, E. Rodríguez-Gallego, R. Beltrán-Debón, M. Pinent, A. Ardévol, M. T. Blay and X.  
763 Terra, Health-Promoting Properties of Proanthocyanidins for Intestinal Dysfunction, *Nutrients*,  
764 2020, **12**, 130.
- 765 6. H. Chu, Q. Tang, H. Huang, W. Hao and X. Wei, Grape-seed proanthocyanidins inhibit the  
766 lipopolysaccharide-induced inflammatory mediator expression in RAW264.7 macrophages by  
767 suppressing MAPK and NF- $\kappa$ B signal pathways, *Environ Toxicol Pharmacol*, 2016, **41**, 159-166.
- 768 7. A. I. S. Andersen-Civil, M. M. Leppä, S. M. Thamsborg, J. P. Salminen and A. R. Williams, Structure-  
769 function analysis of purified proanthocyanidins reveals a role for polymer size in suppressing  
770 inflammatory responses, *Commun Biol*, 2021, **4**, 896.
- 771 8. D. Głąbska, D. Guzek, K. Gałazka and G. Lech, Therapeutic Potential of Proanthocyanidins in  
772 Ulcerative Colitis in Remission, *J Clin Med*, 2020, **9**.
- 773 9. X. Li, X. Yang, Y. Cai, H. Qin, L. Wang, Y. Wang, Y. Huang, X. Wang, S. Yan, L. Wang, X. Zhao, W. Li, S.  
774 Li, J. Chen and Y. Wu, Proanthocyanidins from Grape Seeds Modulate the NF- $\kappa$ B Signal Transduction  
775 Pathways in Rats with TNBS-Induced Ulcerative Colitis, *Molecules*, 2011, **16**, 6721-6731.
- 776 10. A. Fiesel, D. K. Gessner, E. Most and K. Eder, Effects of dietary polyphenol-rich plant products from  
777 grape or hop on pro-inflammatory gene expression in the intestine, nutrient digestibility and faecal  
778 microbiota of weaned pigs, *BMC Vet Res*, 2014, **10**, 196.
- 779 11. Y. Y. Choy, P. Quifer-Rada, D. M. Holstege, S. A. Frese, C. C. Calvert, D. A. Mills, R. M. Lamuela-  
780 Raventos and A. L. Waterhouse, Phenolic metabolites and substantial microbiome changes in pig  
781 feces by ingesting grape seed proanthocyanidins, *Food & Function*, 2014, **5**, 2298-2308.
- 782 12. J. Sehm, H. Linder Mayer, C. Dummer, D. Treutter and M. W. Pfaffl, The influence of polyphenol rich  
783 apple pomace or red-wine pomace diet on the gut morphology in weaning piglets, *Journal of*  
784 *Animal Physiology and Animal Nutrition*, 2007, **91**, 289-296.

- 785 13. X. Tzounis, A. Rodriguez-Mateos, J. Vulevic, G. R. Gibson, C. Kwik-Urbe and J. P. Spencer, Prebiotic  
786 evaluation of cocoa-derived flavanols in healthy humans by using a randomized, controlled, double-  
787 blind, crossover intervention study, *Am J Clin Nutr*, 2011, **93**, 62-72.
- 788 14. W. Liu, S. Zhao, J. Wang, J. Shi, Y. Sun, W. Wang, G. Ning, J. Hong and R. Liu, Grape seed  
789 proanthocyanidin extract ameliorates inflammation and adiposity by modulating gut microbiota in  
790 high-fat diet mice, *Mol Nutr Food Res*, 2017, **61**.
- 791 15. S. Jang, J. Sun, P. Chen, S. Lakshman, A. Molokin, J. M. Harnly, B. T. Vinyard, J. J. F. Urban, C. D.  
792 Davis and G. Solano-Aguilar, Flavanol-Enriched Cocoa Powder Alters the Intestinal Microbiota,  
793 Tissue and Fluid Metabolite Profiles, and Intestinal Gene Expression in Pigs, *The Journal of*  
794 *Nutrition*, 2016, **146**, 673-680.
- 795 16. Y. Wu, N. Ma, P. Song, T. He, C. Levesque, Y. Bai, A. Zhang and X. Ma, Grape Seed Proanthocyanidin  
796 Affects Lipid Metabolism via Changing Gut Microflora and Enhancing Propionate Production in  
797 Weaned Pigs, *The Journal of Nutrition*, 2019, **149**, 1523-1532.
- 798 17. A. I. S. Andersen-Civil, P. Arora and A. R. Williams, Regulation of Enteric Infection and Immunity by  
799 Dietary Proanthocyanidins, *Front Immunol*, 2021, **12**, 637603.
- 800 18. A. T. Dang and B. J. Marsland, Microbes, metabolites, and the gut-lung axis, *Mucosal Immunol*,  
801 2019, **12**, 843-850.
- 802 19. E. R. Morgan, N.-A. A. Aziz, A. Blanchard, J. Charlier, C. Charvet, E. Claerebout, P. Geldhof, A. W.  
803 Greer, H. Hertzberg, J. Hodgkinson, J. Höglund, H. Hoste, R. M. Kaplan, M. Martínez-Valladares, S.  
804 Mitchell, H. W. Ploeger, L. Rinaldi, G. von Samson-Himmelstjerna, S. Sotiraki, M. Schnyder, P. Skuce,  
805 D. Bartley, F. Kenyon, S. M. Thamsborg, H. R. Vineer, T. de Waal, A. R. Williams, J. A. van Wyk and J.  
806 Vercruysse, 100 Questions in Livestock Helminthology Research, *Trends in Parasitology*, 2019, **35**,  
807 52-71.
- 808 20. S. A. P. Colombo and R. K. Grencis, Immunity to Soil-Transmitted Helminths: Evidence From the  
809 Field and Laboratory Models, *Frontiers in immunology*, 2020, **11**, 1286-1286.
- 810 21. F. D. Finkelman, T. Shea-Donohue, S. C. Morris, L. Gildea, R. Strait, K. B. Madden, L. Schopf and J. F.  
811 Urban, Interleukin-4- and interleukin-13-mediated host protection against intestinal nematode  
812 parasites, *Immunological Reviews*, 2004, **201**, 139-155.
- 813 22. T. Lee, H. S. Kwon, B. R. Bang, Y. S. Lee, M. Y. Park, K. A. Moon, T. B. Kim, K. Y. Lee, H. B. Moon and  
814 Y. S. Cho, Grape seed proanthocyanidin extract attenuates allergic inflammation in murine models  
815 of asthma, *J Clin Immunol*, 2012, **32**, 1292-1304.
- 816 23. A. Roepstorff, H. Mejer, P. Nejsun and S. M. Thamsborg, Helminth parasites in pigs: New  
817 challenges in pig production and current research highlights, *Veterinary Parasitology*, 2011, **180**,  
818 72-81.
- 819 24. K. D. Murrell, L. Eriksen, P. Nansen, H. C. Slotved and T. Rasmussen, *Ascaris suum*: A Revision of Its  
820 Early Migratory Path and Implications for Human Ascariasis, *The Journal of Parasitology*, 1997, **83**,  
821 255-260.
- 822 25. P. H. Gazzinelli-Guimarães, A. C. Gazzinelli-Guimarães, F. N. Silva, V. L. Mati, C. Dhom-Lemos Lde, F.  
823 S. Barbosa, L. S. Passos, S. Gaze, C. M. Carneiro, D. C. Bartholomeu, L. L. Bueno and R. T. Fujiwara,  
824 Parasitological and immunological aspects of early *Ascaris* spp. infection in mice, *Int J Parasitol*,  
825 2013, **43**, 697-706.
- 826 26. J. E. Weatherhead, P. Gazzinelli-Guimaraes, J. M. Knight, R. Fujiwara, P. J. Hotez, M. E. Bottazzi and  
827 D. B. Corry, Host Immunity and Inflammation to Pulmonary Helminth Infections, *Front Immunol*,  
828 2020, **11**, 594520.
- 829 27. K. Tjørnehøj, L. Eriksen, B. Aalbaek and P. Nansen, Interaction between *Ascaris suum* and  
830 *Pasteurella multocida* in the lungs of mice, *Parasitol Res*, 1992, **78**, 525-528.
- 831 28. S. E. Curtis, D. A. Tisch, K. S. Todd and J. Simon, Pulmonary bacterial deposition and clearance  
832 during ascarid larval migration in weanling pigs, *Can J Vet Res*, 1987, **51**, 525-527.
- 833 29. S. Jang, S. Lakshman, E. Beshah, Y. Xie, A. Molokin, B. T. Vinyard, J. F. Urban, C. D. Davis and G. I.  
834 Solano-Aguilar, Flavanol-Rich Cocoa Powder Interacts with *Lactobacillus rhamnosus* LGG to Alter

- 835 the Antibody Response to Infection with the Parasitic Nematode *Ascaris suum*, *Nutrients*, 2017, **9**,  
836 1113.
- 837 30. H. Dawson, G. Solano-Aguilar, M. Beal, E. Beshah, V. Vangimalla, E. Jones, S. Botero and J. F. Urban,  
838 Jr., Localized Th1-, Th2-, T regulatory cell-, and inflammation-associated hepatic and pulmonary  
839 immune responses in *Ascaris suum*-infected swine are increased by retinoic acid, *Infect Immun*,  
840 2009, **77**, 2576-2587.
- 841 31. M. T. Engström, M. Päljjarvi, C. Fryganas, J. H. Grabber, I. Mueller-Harvey and J. P. Salminen, Rapid  
842 qualitative and quantitative analyses of proanthocyanidin oligomers and polymers by UPLC-MS/MS,  
843 *J Agric Food Chem*, 2014, **62**, 3390-3399.
- 844 32. M. T. Engström, M. Päljjarvi and J.-P. Salminen, Rapid Fingerprint Analysis of Plant Extracts for  
845 Ellagitannins, Gallic Acid, and Quinic Acid Derivatives and Quercetin-, Kaempferol- and Myricetin-  
846 Based Flavonol Glycosides by UPLC-QqQ-MS/MS, *Journal of Agricultural and Food Chemistry*, 2015,  
847 **63**, 4068-4079.
- 848 33. H. C. Slotved, E. H. Barnes, L. Eriksen, A. Roepstorff, P. Nansen and H. Bjørn, Use of an agar-gel  
849 technique for large scale application to recover *Ascaris suum* larvae from intestinal contents of  
850 pigs., *Acta veterinaria Scandinavica*, 1997, **38**, 207-212.
- 851 34. W. De Coster, S. D'Hert, D. T. Schultz, M. Cruys and C. Van Broeckhoven, NanoPack: visualizing and  
852 processing long-read sequencing data, *Bioinformatics*, 2018, **34**, 2666-2669.
- 853 35. J. G. Caporaso, J. Kuczynski, J. Stombaugh, K. Bittinger, F. D. Bushman, E. K. Costello, N. Fierer, A. G.  
854 Peña, J. K. Goodrich, J. I. Gordon, G. A. Huttley, S. T. Kelley, D. Knights, J. E. Koenig, R. E. Ley, C. A.  
855 Lozupone, D. McDonald, B. D. Muegge, M. Pirrung, J. Reeder, J. R. Sevinsky, P. J. Turnbaugh, W. A.  
856 Walters, J. Widmann, T. Yatsunencko, J. Zaneveld and R. Knight, QIIME allows analysis of high-  
857 throughput community sequencing data, *Nat Methods*, 2010, **7**, 335-336.
- 858 36. D. McDonald, M. N. Price, J. Goodrich, E. P. Nawrocki, T. Z. DeSantis, A. Probst, G. L. Andersen, R.  
859 Knight and P. Hugenholtz, An improved Greengenes taxonomy with explicit ranks for ecological and  
860 evolutionary analyses of bacteria and archaea, *Isme j*, 2012, **6**, 610-618.
- 861 37. E. Bolyen, J. R. Rideout, M. R. Dillon, N. A. Bokulich, C. C. Abnet, G. A. Al-Ghalith, H. Alexander, E. J.  
862 Alm, M. Arumugam, F. Asnicar, Y. Bai, J. E. Bisanz, K. Bittinger, A. Brejnrod, C. J. Brislawn, C. T.  
863 Brown, B. J. Callahan, A. M. Caraballo-Rodríguez, J. Chase, E. K. Cope, R. Da Silva, C. Diener, P. C.  
864 Dorrestein, G. M. Douglas, D. M. Durall, C. Duvallet, C. F. Edwardson, M. Ernst, M. Estaki, J.  
865 Fouquier, J. M. Gauglitz, S. M. Gibbons, D. L. Gibson, A. Gonzalez, K. Gorlick, J. Guo, B. Hillmann, S.  
866 Holmes, H. Holste, C. Huttenhower, G. A. Huttley, S. Janssen, A. K. Jarmusch, L. Jiang, B. D. Kaehler,  
867 K. B. Kang, C. R. Keefe, P. Keim, S. T. Kelley, D. Knights, I. Koester, T. Kosciulek, J. Kreps, M. G. I.  
868 Langille, J. Lee, R. Ley, Y. X. Liu, E. Loftfield, C. Lozupone, M. Maher, C. Marotz, B. D. Martin, D.  
869 McDonald, L. J. McIver, A. V. Melnik, J. L. Metcalf, S. C. Morgan, J. T. Morton, A. T. Naimey, J. A.  
870 Navas-Molina, L. F. Nothias, S. B. Orchanian, T. Pearson, S. L. Peoples, D. Petras, M. L. Preuss, E.  
871 Pruesse, L. B. Rasmussen, A. Rivers, M. S. Robeson, 2nd, P. Rosenthal, N. Segata, M. Shaffer, A.  
872 Shiffer, R. Sinha, S. J. Song, J. R. Spear, A. D. Swofford, L. R. Thompson, P. J. Torres, P. Trinh, A.  
873 Tripathi, P. J. Turnbaugh, S. Ul-Hasan, J. J. J. van der Hoof, F. Vargas, Y. Vázquez-Baeza, E.  
874 Vogtmann, M. von Hippel, W. Walters, Y. Wan, M. Wang, J. Warren, K. C. Weber, C. H. D.  
875 Williamson, A. D. Willis, Z. Z. Xu, J. R. Zaneveld, Y. Zhang, Q. Zhu, R. Knight and J. G. Caporaso,  
876 Author Correction: Reproducible, interactive, scalable and extensible microbiome data science  
877 using QIIME 2, *Nat Biotechnol*, 2019, **37**, 1091.
- 878 38. P. J. McMurdie and S. Holmes, phyloseq: an R package for reproducible interactive analysis and  
879 graphics of microbiome census data, *PLoS One*, 2013, **8**, e61217.
- 880 39. J. Oksanen, R. Kindt and O. H. B. vegan: Community Ecology Package. *Journal*, 2005.
- 881 40. H. Wickham., Welcome to the Tidyverse, *Journal of Open Source Software*, 2019, **4**, 1686.
- 882 41. A. Kassambara, ggplot2' Based Publication Ready Plots. *Journal*, 2020.
- 883 42. H. Wickham, Reshaping Data with the reshape Package, *Journal of Statistical Software*, 2007, **21**, 1 -  
884 20.

- 885 43. S. Garnier, viridis: Default Color Maps from 'matplotlib'. *Journal*, 2018.
- 886 44. N. Canibe, O. Højberg, J. H. Badsberg and B. B. Jensen, Effect of feeding fermented liquid feed and  
887 fermented grain on gastrointestinal ecology and growth performance in piglets, *J Anim Sci*, 2007,  
888 **85**, 2959-2971.
- 889 45. A. R. Williams, T. V. A. Hansen, L. Krych, H. F. B. Ahmad, D. S. Nielsen, K. Skovgaard and S. M.  
890 Thamsborg, Dietary cinnamaldehyde enhances acquisition of specific antibodies following helminth  
891 infection in pigs, *Veterinary Immunology and Immunopathology*, 2017, **189**, 43-52.
- 892 46. J. Goedhart and M. S. Luijsterburg, VolcanoR is a web app for creating, exploring, labeling and  
893 sharing volcano plots, *Scientific Reports*, 2020, **10**, 20560.
- 894 47. T. Metsalu and J. Vilo, ClustVis: a web tool for visualizing clustering of multivariate data using  
895 Principal Component Analysis and heatmap, *Nucleic Acids Research*, 2015, **43**, W566-W570.
- 896 48. A. Roepstorff, L. Eriksen, H.-C. Slotved and P. Nansen, Experimental *Ascaris suum* infection in the  
897 pig: worm population kinetics following single inoculations with three doses of infective eggs,  
898 *Parasitology*, 1997, **115**, 443-452.
- 899 49. S. R. Jakobsen, L. J. Myhill and A. R. Williams, Effects of *Ascaris* and *Trichuris* antigens on cytokine  
900 production in porcine blood mononuclear and epithelial cells, *Vet Immunol Immunopathol*, 2019,  
901 **211**, 6-9.
- 902 50. D. Masure, T. Wang, J. Vlamincx, S. Claerhoudt, K. Chiers, W. Van den Broeck, J. Saunders, J.  
903 Vercruyse and P. Geldhof, The Intestinal Expulsion of the Roundworm *Ascaris suum* Is Associated  
904 with Eosinophils, Intra-Epithelial T Cells and Decreased Intestinal Transit Time, *PLoS Negl Trop Dis*,  
905 2013, **7**, e2588.
- 906 51. J. S. Gauer, S. Tumova, J. D. Lippiat, A. Kerimi and G. Williamson, Differential patterns of inhibition  
907 of the sugar transporters GLUT2, GLUT5 and GLUT7 by flavonoids, *Biochem Pharmacol*, 2018, **152**,  
908 11-20.
- 909 52. T. Tsuji, Y. Naito, T. Takagi, M. Kugai, H. Yoriki, R. Horie, A. Fukui, K. Mizushima, Y. Hirai, K. Katada,  
910 K. Kamada, K. Uchiyama, O. Handa, H. Konishi, N. Yagi, H. Ichikawa, R. Yanagisawa, J. S. Suzuki, H.  
911 Takano, M. Satoh and T. Yoshikawa, Role of metallothionein in murine experimental colitis, *Int J*  
912 *Mol Med*, 2013, **31**, 1037-1046.
- 913 53. G. Minowada and W. J. Welch, Clinical implications of the stress response, *J Clin Invest*, 1995, **95**, 3-  
914 12.
- 915 54. A. Bouron, Transcriptomic Profiling of Ca<sup>2+</sup> Transport Systems During the Formation of the  
916 Cerebral Cortex in Mice, *Cells*, 2020, **9**.
- 917 55. R. Snyder and T. Thekkumkara, 13-cis-Retinoic acid specific down-regulation of angiotensin type 1  
918 receptor in rat liver epithelial and aortic smooth muscle cells, *J Mol Endocrinol*, 2012, **48**, 99-114.
- 919 56. D. M. Zaiss, L. Yang, P. R. Shah, J. J. Kobie, J. F. Urban and T. R. Mosmann, Amphiregulin, a TH2  
920 cytokine enhancing resistance to nematodes, *Science*, 2006, **314**, 1746.
- 921 57. P. Carvalho Cabral, M. Olivier and N. Cermakian, The Complex Interplay of Parasites, Their Hosts,  
922 and Circadian Clocks, *Front Cell Infect Microbiol*, 2019, **9**, 425.
- 923 58. T. Schewe, C. Sadik, L. O. Klotz, T. Yoshimoto, H. Kühn and H. Sies, Polyphenols of cocoa: inhibition  
924 of mammalian 15-lipoxygenase, *Biol Chem*, 2001, **382**, 1687-1696.
- 925 59. T. P. Brosschot and L. A. Reynolds, The impact of a helminth-modified microbiome on host  
926 immunity, *Mucosal Immunol*, 2018, **11**, 1039-1046.
- 927 60. J. Dicksved, O. Schreiber, B. Willing, J. Petersson, S. Rang, M. Phillipson, L. Holm and S. Roos,  
928 *Lactobacillus reuteri* maintains a functional mucosal barrier during DSS treatment despite mucus  
929 layer dysfunction, *PLoS One*, 2012, **7**, e46399.
- 930 61. J. K. Spinler, M. Taweechotipatr, C. L. Rognerud, C. N. Ou, S. Tumwasorn and J. Versalovic, Human-  
931 derived probiotic *Lactobacillus reuteri* demonstrate antimicrobial activities targeting diverse enteric  
932 bacterial pathogens, *Anaerobe*, 2008, **14**, 166-171.
- 933 62. H. M. Roager, L. B. Hansen, M. I. Bahl, H. L. Frandsen, V. Carvalho, R. J. Gøbel, M. D. Dalgaard, D. R.  
934 Plichta, M. H. Sparholt, H. Vestergaard, T. Hansen, T. Sicheritz-Pontén, H. B. Nielsen, O. Pedersen, L.

- 935 Lauritzen, M. Kristensen, R. Gupta and T. R. Licht, Colonic transit time is related to bacterial  
936 metabolism and mucosal turnover in the gut, *Nat Microbiol*, 2016, **1**, 16093.
- 937 63. A. R. Williams, L. Krych, H. Fauzan Ahmad, P. Nejsum, K. Skovgaard, D. S. Nielsen and S. M.  
938 Thamsborg, A polyphenol-enriched diet and *Ascaris suum* infection modulate mucosal immune  
939 responses and gut microbiota composition in pigs, *PLOS ONE*, 2017, **12**, e0186546.
- 940 64. T. W. Hopwood, S. Hall, N. Begley, R. Forman, S. Brown, R. Vonslow, B. Saer, M. C. Little, E. A.  
941 Murphy, R. J. Hurst, D. W. Ray, A. S. MacDonald, A. Brass, D. A. Bechtold, J. E. Gibbs, A. S. Loudon  
942 and K. J. Else, The circadian regulator BMAL1 programmes responses to parasitic worm infection via  
943 a dendritic cell clock, *Sci Rep*, 2018, **8**, 3782.
- 944 65. P. Skallerup, P. Nejsum, C. B. Jørgensen, H. H. Göring, P. Karlskov-Mortensen, A. L. Archibald, M.  
945 Fredholm and S. M. Thamsborg, Detection of a quantitative trait locus associated with resistance to  
946 *Ascaris suum* infection in pigs, *Int J Parasitol*, 2012, **42**, 383-391.
- 947 66. M. M. Appeldoorn, J. P. Vincken, H. Gruppen and P. C. Hollman, Procyanidin dimers A1, A2, and B2  
948 are absorbed without conjugation or methylation from the small intestine of rats, *J Nutr*, 2009, **139**,  
949 1469-1473.
- 950 67. W. Tao, Y. Zhang, X. Shen, Y. Cao, J. Shi, X. Ye and S. Chen, Rethinking the Mechanism of the Health  
951 Benefits of Proanthocyanidins: Absorption, Metabolism, and Interaction with Gut Microbiota,  
952 *Comprehensive Reviews in Food Science and Food Safety*, 2019, **18**, 971-985.
- 953 68. I. Rodríguez-Ramiro, S. Ramos, L. Bravo, L. Goya and M. Á. Martín, Procyanidin B2 induces Nrf2  
954 translocation and glutathione S-transferase P1 expression via ERKs and p38-MAPK pathways and  
955 protect human colonic cells against oxidative stress, *Eur J Nutr*, 2012, **51**, 881-892.
- 956 69. S. T. Walk, A. M. Blum, S. A. Ewing, J. V. Weinstock and V. B. Young, Alteration of the murine gut  
957 microbiota during infection with the parasitic helminth *Heligmosomoides polygyrus*, *Inflamm Bowel*  
958 *Dis*, 2010, **16**, 1841-1849.
- 959 70. L. A. Reynolds, K. A. Smith, K. J. Filbey, Y. Harcus, J. P. Hewitson, S. A. Redpath, Y. Valdez, M. J.  
960 Yebra, B. B. Finlay and R. M. Maizels, Commensal-pathogen interactions in the intestinal tract:  
961 lactobacilli promote infection with, and are promoted by, helminth parasites, *Gut Microbes*, 2014,  
962 **5**, 522-532.
- 963 71. M. L. Van Tassel and M. J. Miller, Lactobacillus adhesion to mucus, *Nutrients*, 2011, **3**, 613-636.
- 964

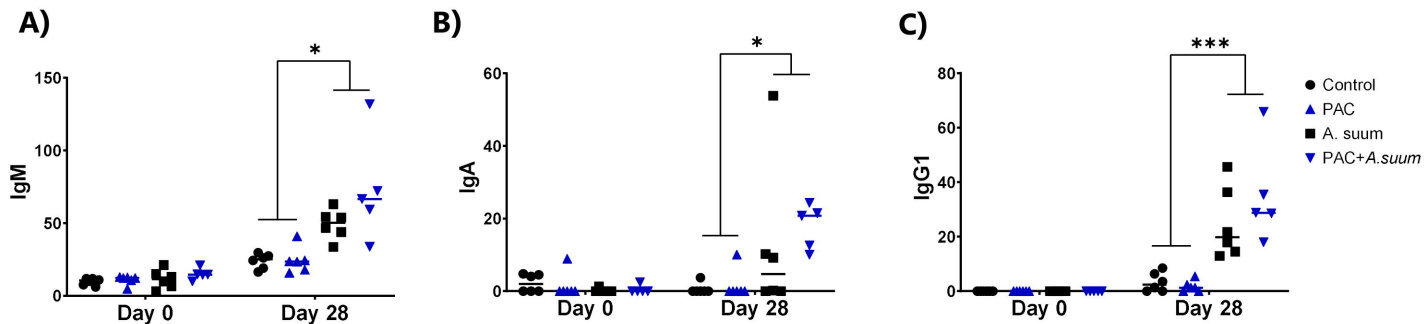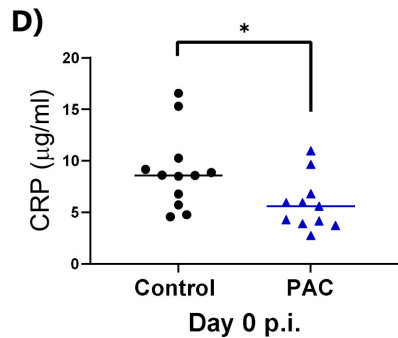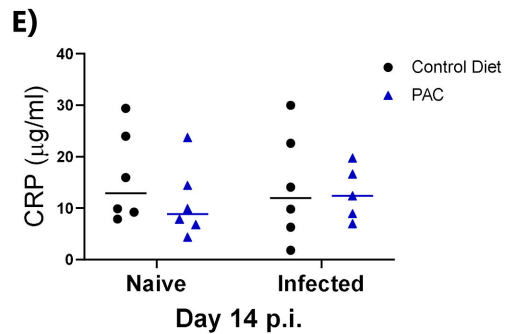

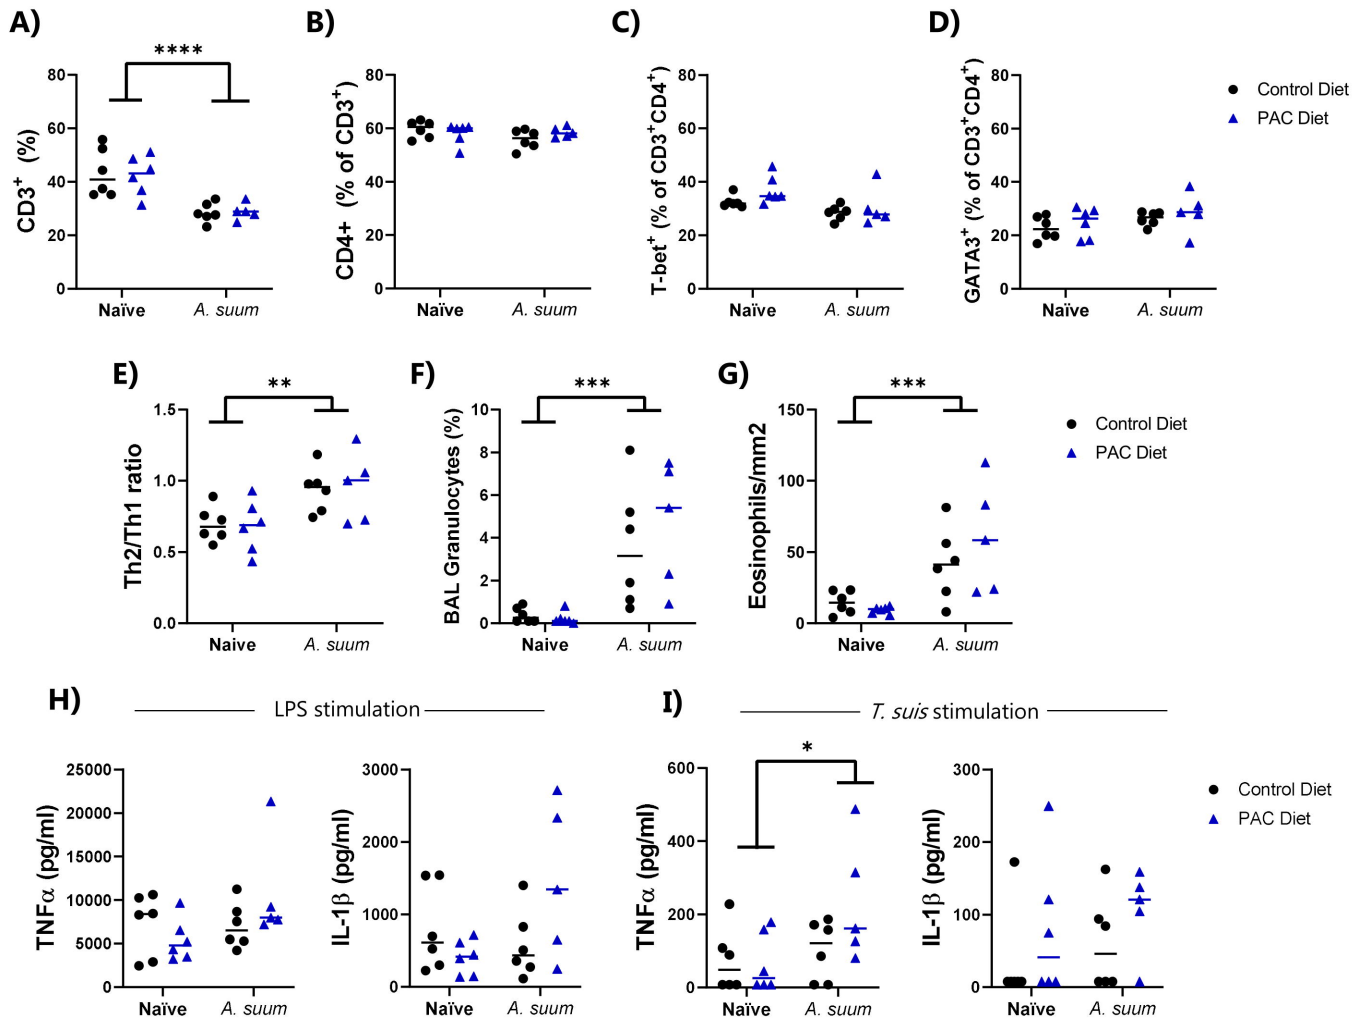

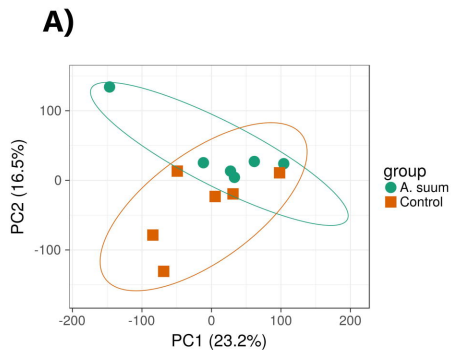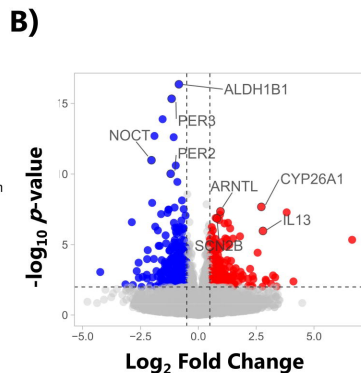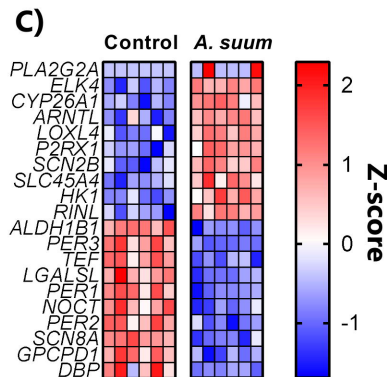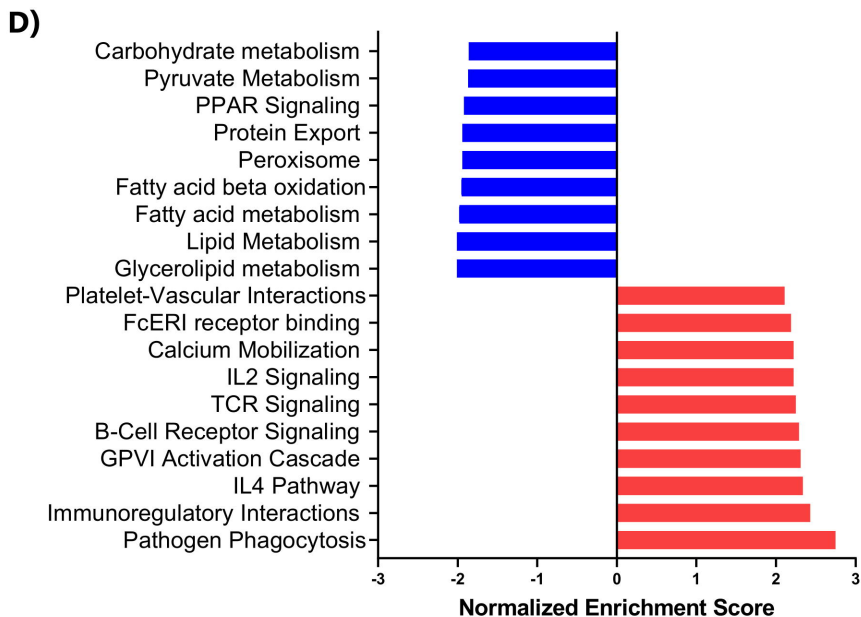



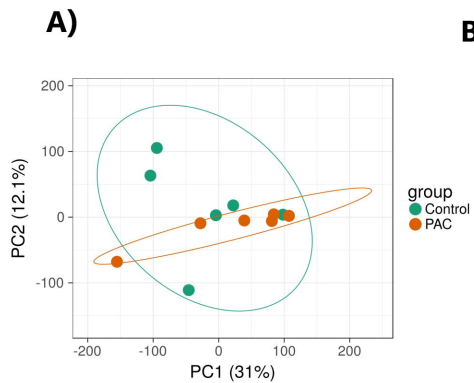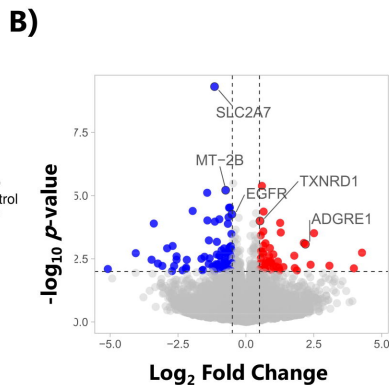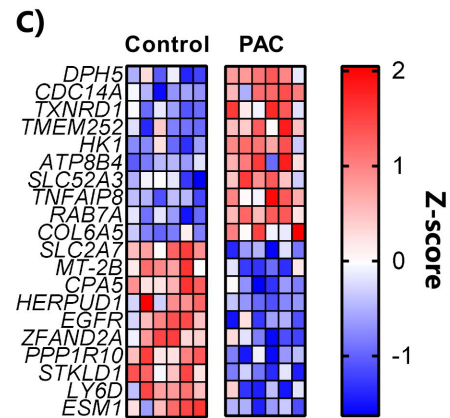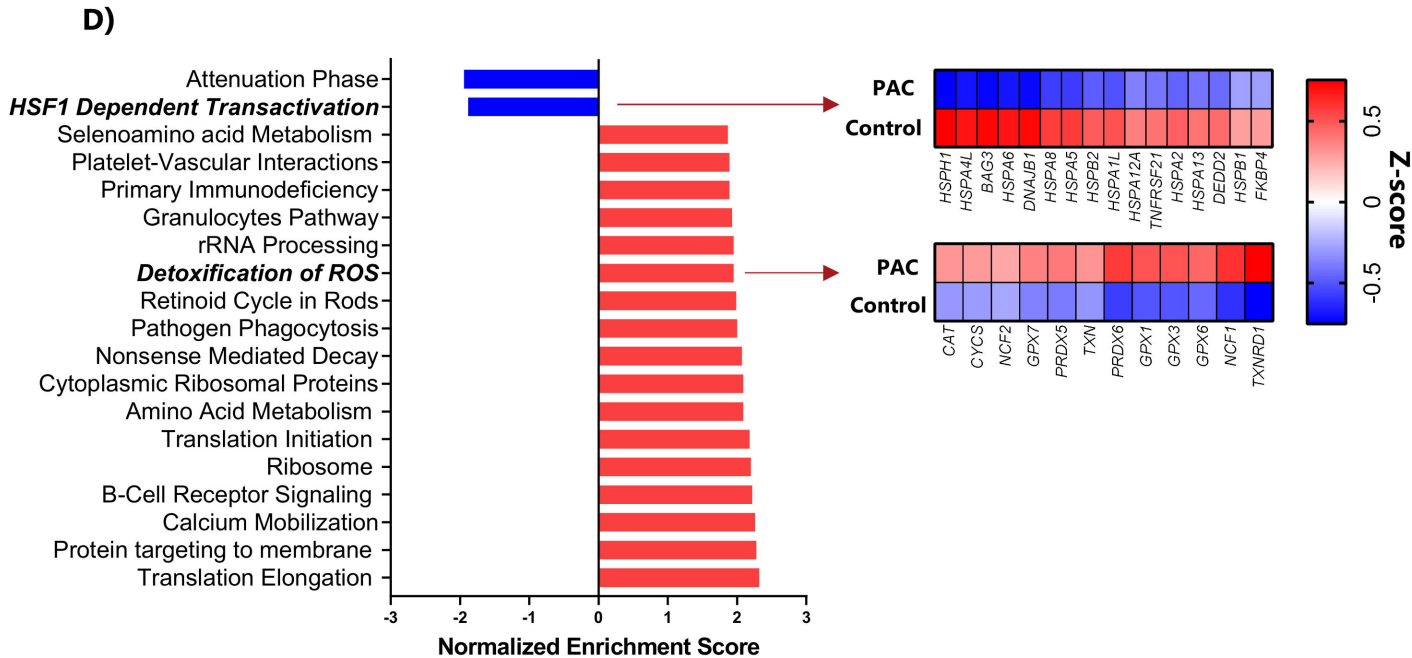

**A)**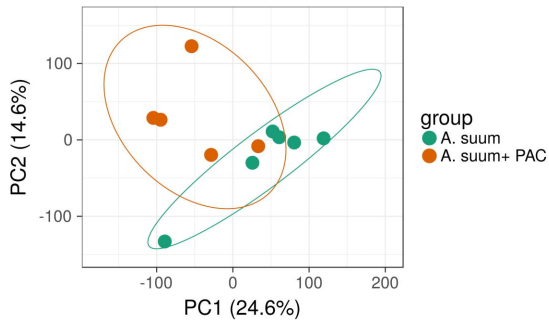**B)**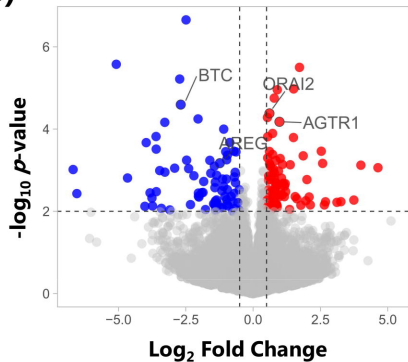**C)**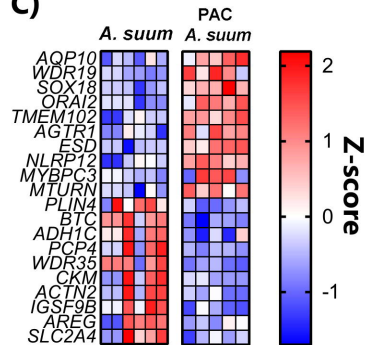

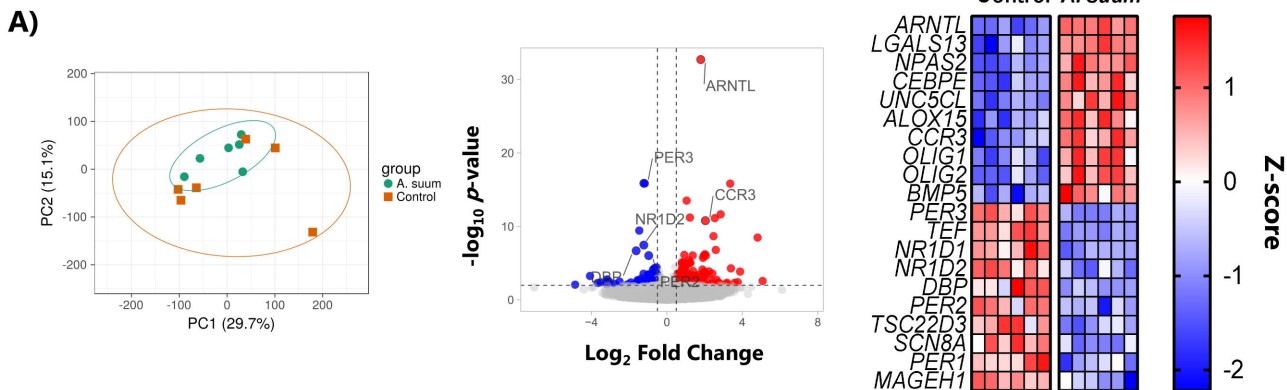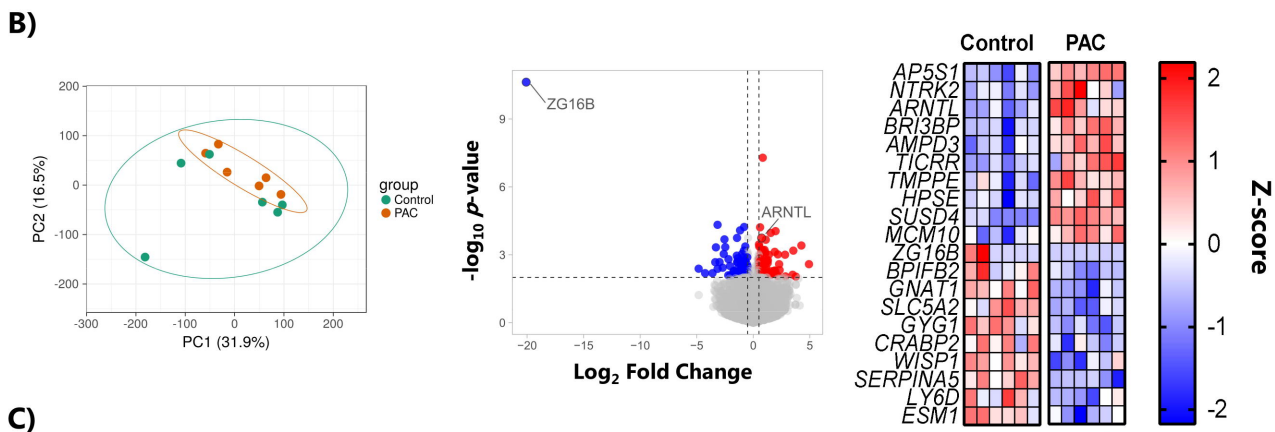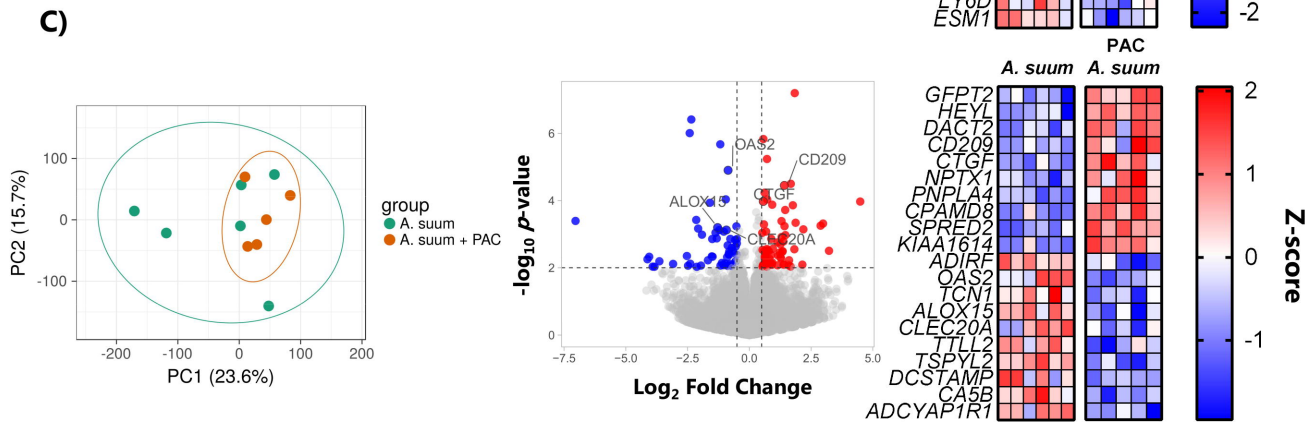

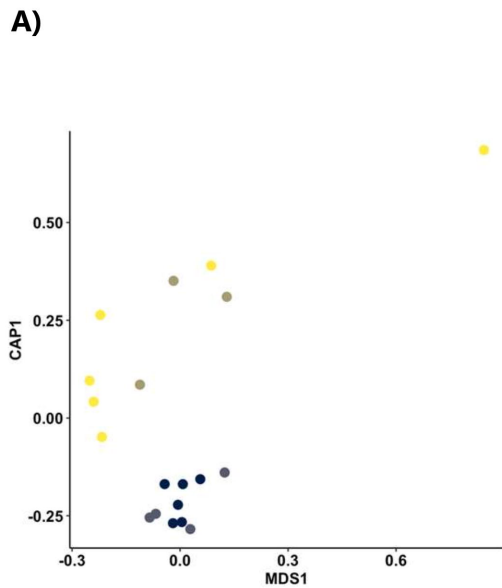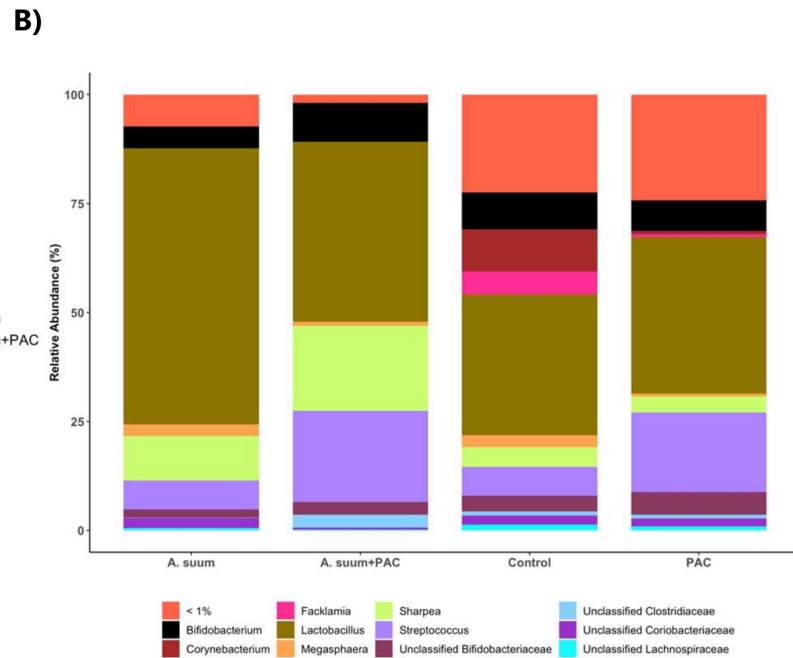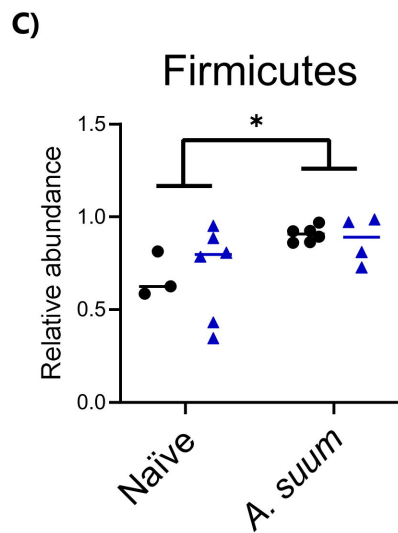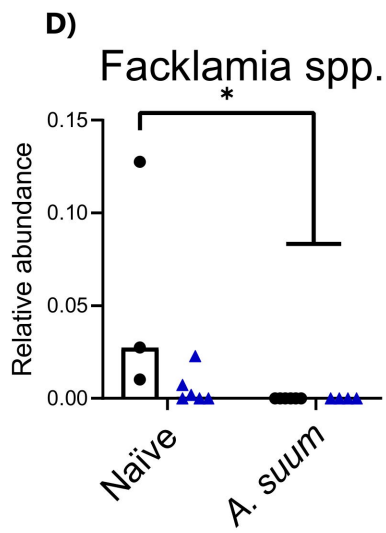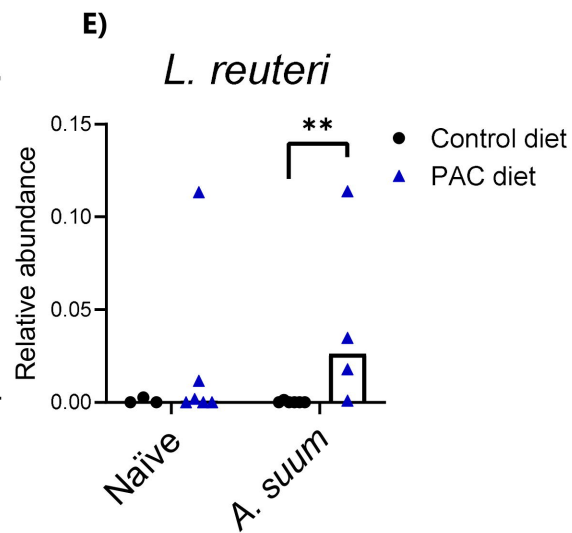

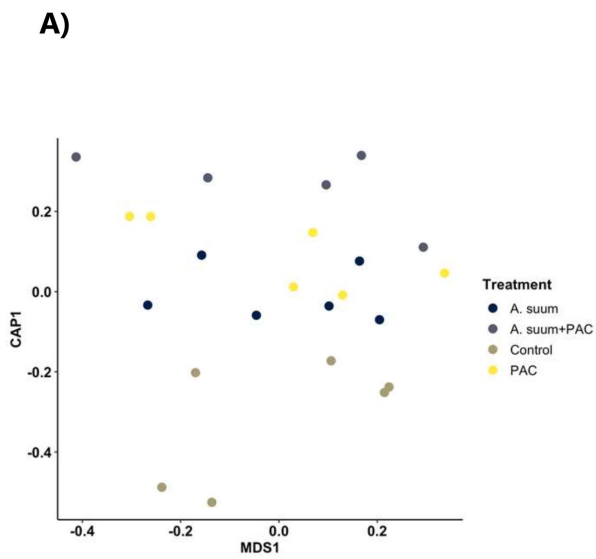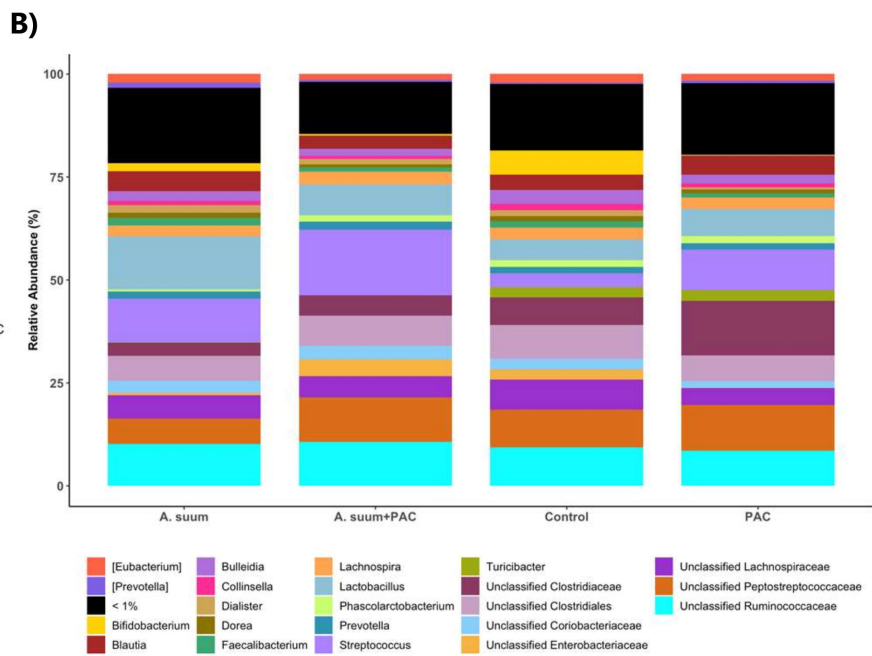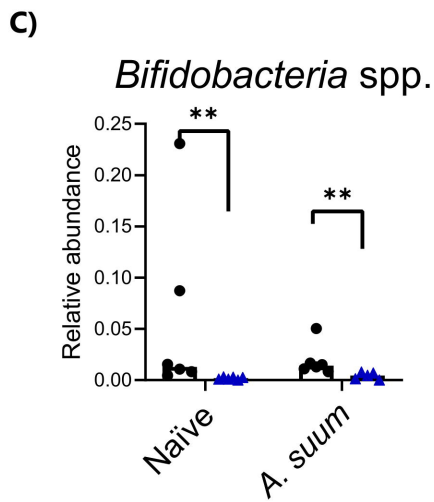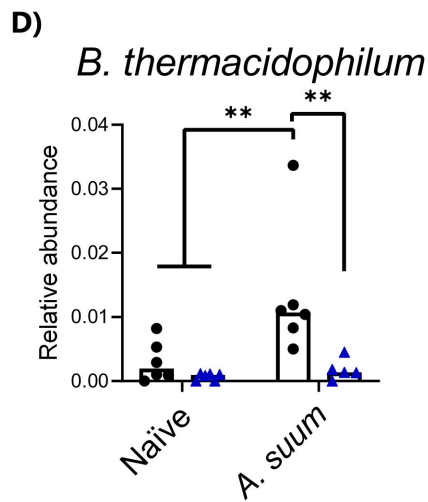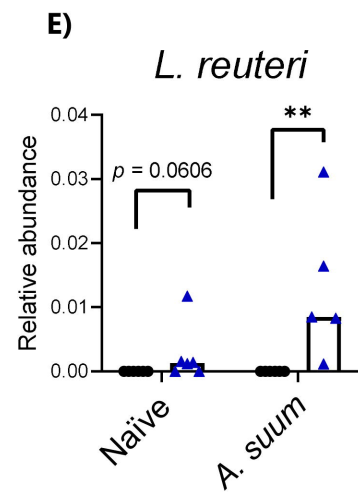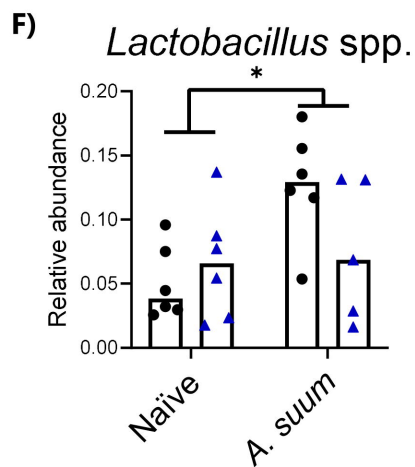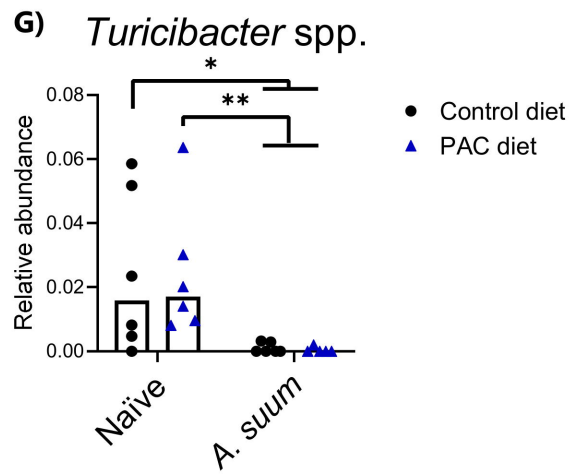

Source: http://biorxiv.org/content/10.1101/2021.10.12.464117v1.full.pdf
